# Supplementary material for: Open-shell singlet diradicaloid difluoreno[4,3-b:3′,4′-d]furan and its radical cation and dianion
Source: Royal Society of Chemistry journal article supplement (doi:10.1039/d0cc01638a), 2020-01-01
Supplement: d0cc01638a1.pdf [file d0cc01638a1.pdf]

*Electronic supplementary information*

**Open-shell singlet diradicaloid difluoreno[4,3-*b*:3',4'-*d*]furan  
and its radical cation and dianion**

Sakura Mori,<sup>a</sup> Motoko Akita,<sup>b</sup> Shuichi Suzuki,<sup>c</sup> Motoko S. Asano,<sup>d</sup>  
Michihisa Murata,<sup>e</sup> Taisuke Matsumoto,<sup>f</sup> Tsuyoshi Akiyama,<sup>a</sup>  
Chitoshi Kitamura,<sup>a</sup> and Shin-ichiro Kato\*<sup>a</sup>

<sup>a</sup> Department of Materials Science, School of Engineering, The University of Shiga Prefecture,  
2500 Hassaka-cho, Hikone, Shiga 522-8533, Japan

<sup>b</sup> Graduate School of Material Science, Josai University, 1-1 Sakado, Saitama 350-0295, Japan

<sup>c</sup> Department of Chemistry, Graduate School of Engineering Science, Osaka University, 1-3  
Machikaneyama-cho, Toyonaka, Osaka 560-8531, Japan

<sup>d</sup> Division of Molecular Science, Faculty of Science and Technology, Gunma University, 1-5-1  
Tenjin-cho, Kiryu, Gunma 376-8515, Japan

<sup>e</sup> Department of Applied Chemistry, Faculty of Engineering, Osaka Institute of Technology, 5-16-1  
Ohmiya, Asahi-ku, Osaka 535-8585, Japan

<sup>f</sup> Institute for Materials Chemistry and Engineering (IMCE), Kyushu University, 6-1 Kasuga-koh-en,  
Kasuga 816-8580, Japan

Table of Contents

1. General experimental methods (S2)
2. Synthesis (S2)
3. X-ray crystallographic data (S7)
4. Electrochemical data (S8)
5. ESR data (S9)
6. Theoretical data (S12)
7. <sup>1</sup>H and <sup>13</sup>C NMR, NOESY, and COSY spectral data (S33)
8. References (S44)

## 1. General experimental methods

Commercially available reagents and solvents were used as received. Oil bath was used as the heat source. Column chromatography and plug filtrations were carried out with SiO<sub>2</sub>. Thin-layer chromatography (TLC) was conducted on aluminum sheets coated with SiO<sub>2</sub> 60 F<sub>254</sub>. Melting points (M.p.) were measured with a hot-stage apparatus (Yanako MP-S3) and are uncorrected. Recycling gel-permeation chromatography (JAIGEL LC-918) was performed with UV detectors using 1H and 2H polystyrene columns eluting with CHCl<sub>3</sub>. <sup>1</sup>H and <sup>13</sup>C NMR spectra were recorded on a spectrometer (JEOL JNM-LA400 or JNM-ECS400) at 400 MHz for <sup>1</sup>H and 100 MHz for <sup>13</sup>C, respectively. Residual solvent signals in the <sup>1</sup>H and <sup>13</sup>C NMR spectra were used as an internal reference. ESI- (Thermo Fisher Scientific LTQ Orbitrap XL) and EI-MS (JEOL JMS-T100 GCV 4G) spectrometries were conducted in a positive or negative mode. Electronic absorption spectra (JASCO V-670 or JV-550) were measured in a cuvette of 1 cm at room temperature. Cyclic voltammetry (EC Frontier ECstat-100) was performed by using a cell equipped with a platinum as working electrode, a platinum wire as counter electrodes, and Ag/AgNO<sub>3</sub> as a referential electrode. All electrochemical measurements were performed in CH<sub>2</sub>Cl<sub>2</sub> solution (*ca.* 5 × 10<sup>-4</sup> mol L<sup>-1</sup>) containing 0.1 mol L<sup>-1</sup> [(*n*-Bu)<sub>4</sub>N][PF<sub>6</sub>] at room temperature. All potentials are referenced to the ferrocenium/ferrocene (Fc<sup>+</sup>/Fc) couple, used as a standard. In situ UV-vis-NIR spectroelectrochemical studies (ALS Electrochemical Analyzer 420) were conducted by using a thin layer cell (1 mm) with a platinum mesh as working electrode, a platinum wire as counter electrode, and Ag/Ag<sup>+</sup> as a referential electrode; sample was electrolyzed for 90 sec for oxidation. X-Ray crystal structure analysis for a single crystal was performed with an X-ray diffractometer (Rigaku FR-E+) for which a Mo-Kα was used. ESR spectra (JEOL JES-TE200 or Bruker EMX Plus) were taken on instruments equipped for variable-temperature experiments. Quantum chemical calculations were performed by Gaussian 09 package of ab initio MO calculations.<sup>1</sup> The anisotropy of current-induced density (ACID) plots were analyzed by the ACID 2.0.1 program provided by Prof. Rainer Herges (Institut für Organische Chemie, Universität Kiel).<sup>2,3</sup> Elemental analysis was performed in A Rabbit Science Japan Co.,Ltd.

## 2. Synthesis

### Preparation of iodide 5

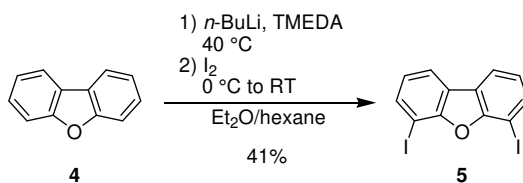

A *n*-BuLi (1.55 mol L<sup>-1</sup> solution in hexane, 24 mL, 37.6 mmol, 3.0 eq.) was added dropwise to a solution of dibenzofuran (4) (2.11 g, 12.5 mmol) and *N,N,N',N'*-tetramethylethylenediamine (5.6 mL,

37.6 mmol, 3.0 eq.) in Et<sub>2</sub>O/hexane (134 mL, 2:3) at room temperature under nitrogen atmosphere. The resulting mixture was stirred at 40 °C for 3 h. The mixture was cooled to 0 °C, and iodine (14.4 g, 57.7 mmol, 4.6 eq.) was added. The resulting mixture was warmed to room temperature and stirred for 3 h. After addition of aqueous NaHSO<sub>3</sub> (5%, 150 mL), the organic phase was separated and evaporated under reduced pressure, and the aqueous phase was extracted with CH<sub>2</sub>Cl<sub>2</sub> (20 mL × 4). The combined organic phase was washed with H<sub>2</sub>O (100 mL × 3), dried over anhydrous Na<sub>2</sub>SO<sub>4</sub>, and evaporated under reduced pressure. The combined residue was purified by recrystallization from hexane to give **5** (2.2 g, 5.2 mmol, 41%) as pale brown solids. M.p. 157–158 °C; <sup>1</sup>H NMR (400 MHz, CDCl<sub>3</sub>): δ 7.88 (2H, dd, *J* = 1.2 & 7.6 Hz), 7.85 (2H, dd, *J* = 1.2 & 7.6 Hz), 7.13 (2H, t, *J* = 7.6 Hz); <sup>13</sup>C NMR (100 MHz, CDCl<sub>3</sub>): δ 156.11, 136.70, 124.94, 121.13, 75.74 (5 signals out of 6 expected); UV–vis (CH<sub>2</sub>Cl<sub>2</sub>): λ<sub>max</sub><sup>abs</sup> (relative intensity) 257 (sh, 0.51), 265 (0.61), 277 (sh, 0.65), 287 (1.0), 302 (0.38), 313 (0.32) nm; HR-EI-MS (TIC, positive): *m/z* calcd for C<sub>12</sub>H<sub>6</sub>I<sub>2</sub>O 419.8508, found 419.8495 [M<sup>+</sup>].

### Preparation of aldehyde **6**

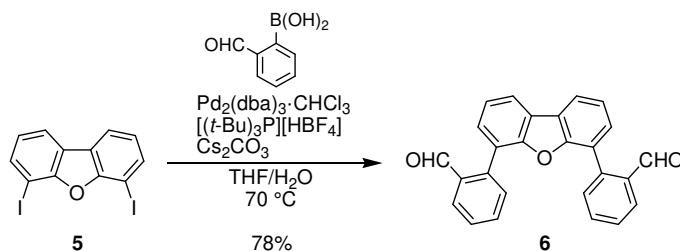

A solution of iodide **5** (1.0 g, 2.38 mmol), 2-formylphenylboronic acid (856 mg, 5.71 mmol, 2.4 eq.), Cs<sub>2</sub>CO<sub>3</sub> (1.71 g, 5.24 mmol, 2.2 eq.), Pd<sub>2</sub>(dba)<sub>3</sub>·CHCl<sub>3</sub> (123 mg, 0.119 mmol, 0.05 eq.), and [(*t*-Bu)<sub>3</sub>P][HBF<sub>4</sub>] (69 mg, 0.24 mmol, 0.1 eq.) in degassed THF/H<sub>2</sub>O (30:1, 60 mL) was stirred at 70 °C for 12 h under nitrogen atmosphere. After addition of H<sub>2</sub>O (100 mL), the organic phase was separated and evaporated under reduced pressure, and the aqueous phase was extracted with CH<sub>2</sub>Cl<sub>2</sub> (20 mL × 4). The combined organic phase was washed with H<sub>2</sub>O (10 mL × 3), dried over anhydrous Na<sub>2</sub>SO<sub>4</sub>, and evaporated under reduced pressure. The combined residue was purified by column chromatography (SiO<sub>2</sub>, CH<sub>2</sub>Cl<sub>2</sub>/hexane 4:1) to give **6** (700 mg, 1.9 mmol, 78%) as white solids. M.p. 186–187 °C; <sup>1</sup>H NMR (400 MHz, CDCl<sub>3</sub>): δ 9.90 (2H, s), 8.09 (2H, dd, *J* = 1.4 & 7.4 Hz), 8.02 (2H, dd, *J* = 0.8 & 7.6 Hz), 7.67 (2H, td, *J* = 1.4 & 7.4 Hz), 7.57–7.50 (4H, m), 7.51 (2H, t, *J* = 7.6 Hz), 7.44 (2H, dd, *J* = 1.4 & 7.4 Hz); <sup>13</sup>C NMR (100 MHz, CDCl<sub>3</sub>): δ 191.88, 191.78, 153.81, 139.39, 133.94, 133.86, 131.61, 129.74, 128.58, 128.01, 124.58, 123.57, 122.64, 121.20 (13 signals out of 14 expected); UV–vis (CH<sub>2</sub>Cl<sub>2</sub>): λ<sub>max</sub><sup>abs</sup> (relative intensity) 295 (1.0), 320 (sh, 0.54) nm; HR-ESI-MS (FT, positive): *m/z* calcd for C<sub>26</sub>H<sub>16</sub>O<sub>3</sub>Na 399.0991, found 399.0991 [(M+Na)<sup>+</sup>].

### Preparation of dihydrodifluorenofuran **7**

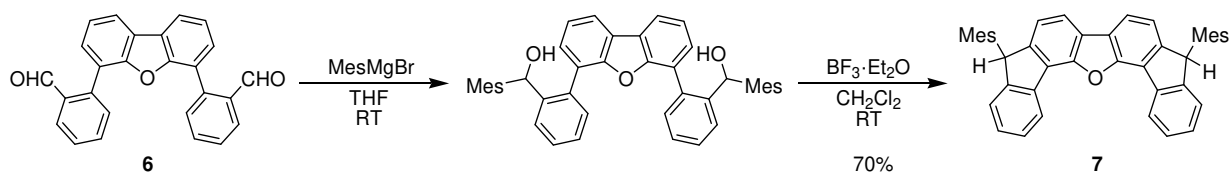

Mesitylmagnesium bromide (1 mol L<sup>-1</sup> solution in THF, 10 mL, 10.0 mmol, 4.2 eq.) was added in a THF solution (20 mL) of aldehyde **6** (904 mg, 2.40 mmol) at room temperature, and the resulting solution was stirred for 20 h. After addition of H<sub>2</sub>O (20 mL), the organic phase was separated and evaporated under reduced pressure. After the aqueous phase was extracted with CH<sub>2</sub>Cl<sub>2</sub> (10 mL × 4), the combined organic phase was washed with H<sub>2</sub>O (10 mL × 4), dried over anhydrous Na<sub>2</sub>SO<sub>4</sub>, and evaporated under reduced pressure. The combined residue was subjected to column chromatography (SiO<sub>2</sub>, CH<sub>2</sub>Cl<sub>2</sub>/hexane 5:1) and recrystallization (hexane/CH<sub>2</sub>Cl<sub>2</sub>) to give crude alcohol (1.06 g). To a solution of crude alcohol (1.06 g) in CH<sub>2</sub>Cl<sub>2</sub> (110 mL) was added BF<sub>3</sub>·OEt<sub>2</sub> (2.2 mL, 17.2 mmol) at room temperature under nitrogen atmosphere. After the mixture was stirred for 20 min, aqueous NaHSO<sub>3</sub> (5%, 100 mL) was added. The organic phase was separated, and the aqueous phase was extracted with CH<sub>2</sub>Cl<sub>2</sub> (10 mL × 3). The combined organic phase was washed with H<sub>2</sub>O (5 mL × 3), dried over anhydrous Na<sub>2</sub>SO<sub>4</sub>, and evaporated under reduced pressure to give **7** (970 mg, 1.67 mmol, 70%) as white solids. M.p. 279 °C (decomp.); <sup>1</sup>H NMR (400 MHz, CDCl<sub>3</sub>, diastereomer mixture): δ 8.51 (2H, d, *J* = 7.6 Hz), 7.86 (2H, d, *J* = 7.6 Hz), 7.63 (2H, t, *J* = 7.4 Hz), 7.37 (2H, t, *J* = 7.4 Hz), 7.32 (2H, d, *J* = 7.4 Hz), 7.25 (2H, d, *J* = 7.4 Hz), 7.07 (2H, s), 6.67 (2H, s), 5.71 (2H, s), 2.75 (6H, s), 2.30 (6H, s), 1.13, 1.11 (6H, 2s); <sup>13</sup>C NMR (100 MHz, CDCl<sub>3</sub>, diastereomer mixture): δ 151.54, 147.51, 147.19, 147.18, 138.74, 138.73, 138.14, 137.86, 136.55, 133.94, 133.92, 130.71, 129.04, 127.45, 127.31, 125.47, 124.15, 123.82, 123.36, 119.14, 119.00, 50.80, 21.98, 21.97, 21.03, 18.85, 18.83 (27 signals out of 44 expected); UV-vis (CH<sub>2</sub>Cl<sub>2</sub>): λ<sub>max</sub><sup>abs</sup> (relative intensity) 258 (1.0), 271 (0.86), 281 (sh, 0.79), 291 (sh, 0.66), 299 (0.66), 310 (sh, 0.25), 322 (0.15), 330, (0.02) nm; HR-ESI-MS (FT, positive): *m/z* calcd for C<sub>44</sub>H<sub>37</sub>O 581.2838, found 581.2837 [(M+H)<sup>+</sup>].

### Preparation of difluorenofuran **DFFu**

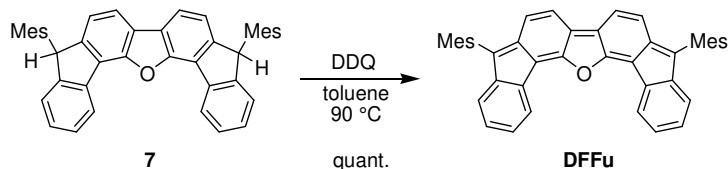

To a solution of dihydrodifluorenofuran **7** (201 mg, 345 μmol) in toluene (40 mL) was added dropwise a solution of 2,3-dichloro-5,6-dicyano-*p*-benzoquinone (DDQ) (141 mg, 621 μmol, 1.8 eq.) in toluene (12 mL) at room temperature under nitrogen atmosphere. After the solution was stirred at 90 °C for 16 h, the resulting solution was diluted with toluene and filtered through a bed of silica gel. The filtrate was evaporated under reduced pressure to give **DFFu** (200 mg, quant.) as dark blue solids. M.p. 276–278 °C; <sup>1</sup>H NMR (400 MHz, CDCl<sub>3</sub>): δ 8.02 (2H, d, *J* = 7.4 Hz), 7.30 (2H, t, *J* = 7.4 Hz), 7.14 (2H, td,

$J = 7.5$  &  $1.1$  Hz),  $7.01$  (4H, s),  $6.96$  (2H, d,  $J = 7.4$  Hz),  $6.95$  (2H, d,  $J = 8.8$  Hz),  $6.75$  (2H, d,  $J = 8.8$  Hz),  $2.38$  (6H, s),  $2.14$  (12H, s);  $^{13}\text{C}$  NMR (100 MHz,  $\text{CDCl}_3$ ):  $\delta$  154.90, 143.95, 141.97, 137.68, 137.37, 136.57, 134.27, 130.67, 128.92, 128.38, 127.37, 127.16, 125.11, 124.17, 122.84, 118.76, 116.58, 21.33, 20.53 (19 signals out of 19 expected); UV-vis-NIR ( $\text{CH}_2\text{Cl}_2$ ):  $\lambda_{\text{max}}^{\text{abs}}$  ( $\epsilon$ ) 268 (60000), 403 (6400), 601 (62500), 670 (20200), 830 (2600) nm; HR-ESI-MS (FT, positive):  $m/z$  calcd for  $\text{C}_{44}\text{H}_{35}\text{O}$  579.2682, found 579.2675 [(M+H) $^+$ ].

### Preparation of radical cation salt $\text{DFFu}^{\bullet+}[\text{SbCl}_6]^-$

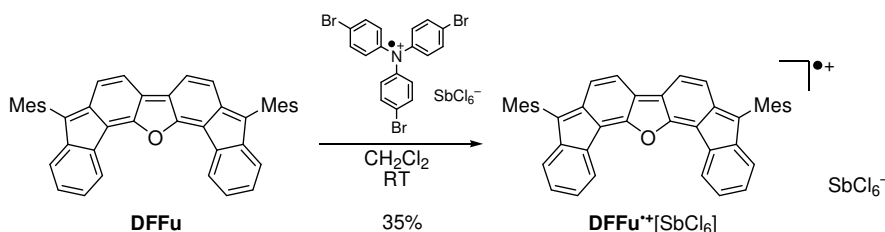

A suspension of difluorenofuran (**DFFu**) (51 mg, 88  $\mu\text{mol}$ ) and tris(4-bromophenyl)aminium hexachloroantimonate (36 mg, 4.3  $\mu\text{mol}$ , 1.0 eq.) in  $\text{CH}_2\text{Cl}_2$  was stirred at room temperature under nitrogen atmosphere for 30 min. After  $\text{CH}_2\text{Cl}_2$  was removed by evaporation under reduced pressure, the residue was purified by washing with  $\text{Et}_2\text{O}$  to give  $\text{DFFu}^{\bullet+}[\text{SbCl}_6]^-$  (14 mg, 15  $\mu\text{mol}$ , 35%) as dark green solids.  $^1\text{H}$  NMR (400 MHz,  $\text{CD}_2\text{Cl}_2$ ): no peak was observed; UV-vis-NIR ( $\text{CH}_2\text{Cl}_2$ ):  $\lambda_{\text{max}}^{\text{abs}}$  ( $\epsilon$ ) 267 (43900), 455 (11800), 625 (26200), 955 (16300), 1045 (18000), 1399 (7300) nm; HR-ESI-MS (FT, positive):  $m/z$  calcd for  $\text{C}_{44}\text{H}_{34}\text{O}$  578.2604, found 578.2599 [(M-SbCl $_6$ ) $^+$ ], (FT, Negative):  $m/z$  calcd for  $\text{SbCl}_6^-$  330.7174, found 330.7173 [(M-C $_{44}\text{H}_{34}\text{O}$ ) $^-$ ]; Elemental analysis:  $\text{C}_{44}\text{H}_{36}\text{O}$  calcd for C 57.87; H 3.75; Cl 23.29; O 1.75; Sb 13.33, found C 57.94; H 3.98; N 0.00.

### Generation of dianion $\text{DFFu}^{2-}$

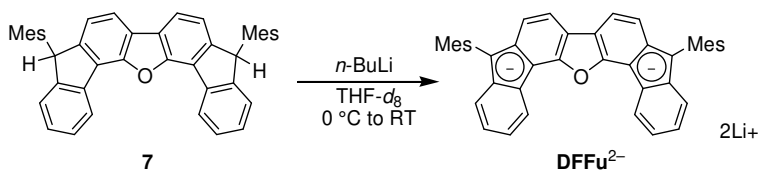

A solution of dihydrodifluorenofuran **7** (10 mg, 17  $\mu\text{mol}$ ) in  $\text{THF-}d_8$  (0.4 mL) in an NMR tube was purged with nitrogen for 40 min. To this THF solution was added dropwise a  $n\text{-BuLi}$  (1.55 mol  $\text{L}^{-1}$  solution in hexane, 0.04 mL, 28  $\mu\text{mol}$ , 3.0 eq.) at 0  $^\circ\text{C}$  under nitrogen atmosphere, and the mixture was stirred at room temperature for 20 min. The reaction mixture turned to deep orange color and gave the solution of the dianion  $\text{DFFu}^{2-}$ . According to the NMR monitoring, the dianion  $\text{DFFu}^{2-}$  was generated almost quantitatively.  $^1\text{H}$  NMR (400 MHz,  $\text{THF-}d_8$ ):  $\delta$  8.66 (2H, d,  $J = 7.6$  Hz), 7.28 (2H, d,  $J = 7.6$  Hz), 6.95 (2H, d,  $J = 8.1$  Hz), 6.88 (4H, s), 6.84 (2H, t,  $J = 7.6$  Hz), 6.83 (2H, d,  $J = 8.1$  Hz), 6.61 (2H, t,  $J = 7.6$  Hz), 2.32 (6H, s), 2.11 (12H, s). Due to its instability under ambient condition, its  $^{13}\text{C}$  NMR and mass spectra were not characterized.

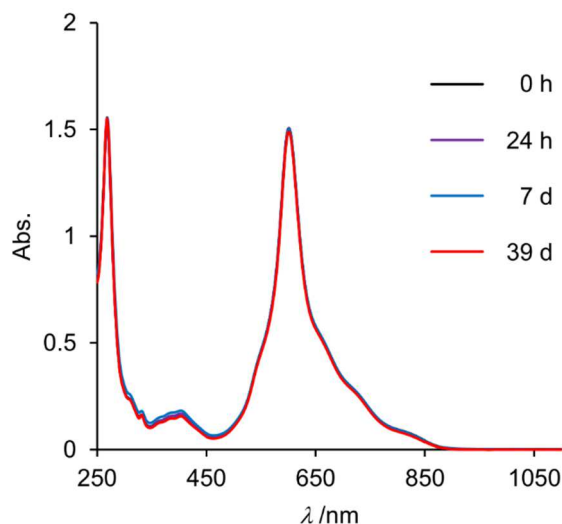

**Figure S1.** Time profiles of UV-vis-NIR spectra of **DFFu** in  $\text{CH}_2\text{Cl}_2$  at RT under aerobic condition.

Compound **2**, synthesized by Frigoli and co-workers, is stable for more than 6 months in non-degassed toluene in the dark and for 1 week in the laboratory environment.<sup>4</sup> Compound **3**, synthesized by Stępień and co-workers, is stable for more than 25 days in  $\text{CH}_2\text{Cl}_2$  under ambient conditions.<sup>5</sup> Overall, the stability of **DFFu** in solution is probably comparable to that of **2** and **3**.

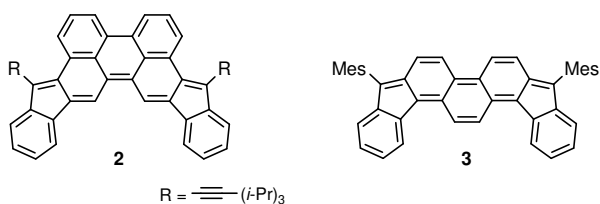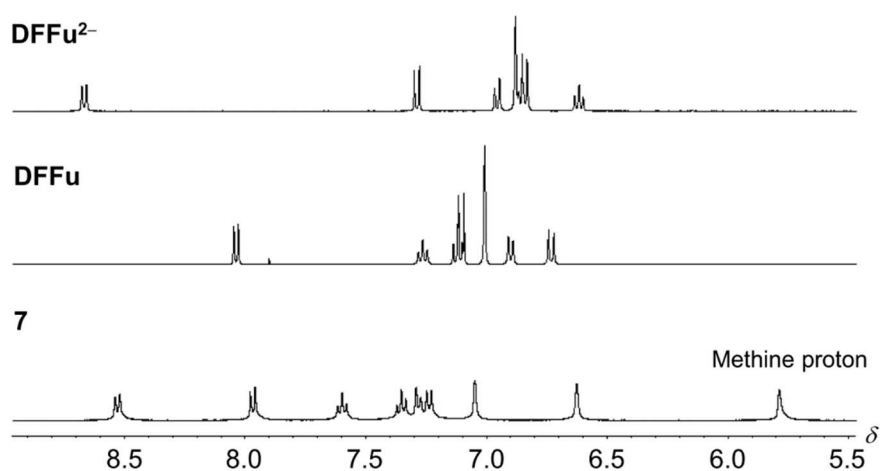

**Figure S2.**  $^1\text{H}$  NMR spectra of **DFFu**<sup>2-</sup>, **DFFu**, and **7** in  $\text{THF-}d_8$ .

### 3. X-ray crystallographic data

Using Olex2,<sup>6</sup> the structure was solved with the ShelXT<sup>7</sup> structure solution program using Intrinsic Phasing and refined with the ShelXL<sup>8</sup> refinement package using Least Squares minimization.

**DFFu** (CCDC 1974502): crystal data at 123 K, C<sub>44</sub>H<sub>34</sub>O, *M<sub>r</sub>* = 578.71, Monoclinic, space group *P2<sub>1</sub>/n*, *D<sub>calcd</sub>* = 1.249 g/cm<sup>3</sup>, *Z* = 4, *a* = 8.0514(2) Å, *b* = 29.7733(7) Å, *c* = 12.8449(3) Å,  $\beta$  = 92.127(2)°, *V* = 3077.02(13) Å<sup>3</sup>; Mo-*K*α radiation,  $\lambda$  = 0.71073 Å,  $\mu$  = 0.073 mm<sup>-1</sup>. A pale yellow crystal was obtained from THF/MeOH solution at 5 °C. Numbers of measured and unique reflections were 7055 and 6041, respectively. Final *R*(*F*) = 0.0404 for 412 parameters and 6041 reflections with *I* > 2σ(*I*) (for all data, *R*(*F*) and *wR*(*F*<sup>2</sup>) values are 0.0478 and 0.1078, respectively).

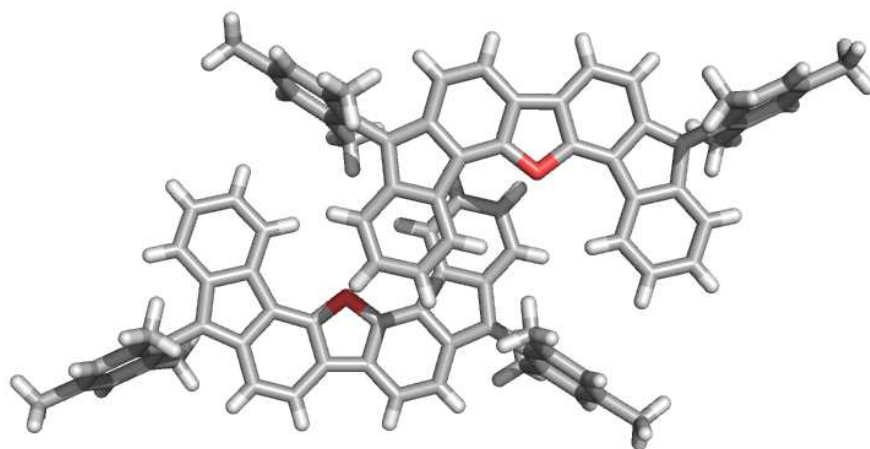

**Figure S3.** Dimeric structure of **DFFu** determined by the X-ray crystallographic analysis.

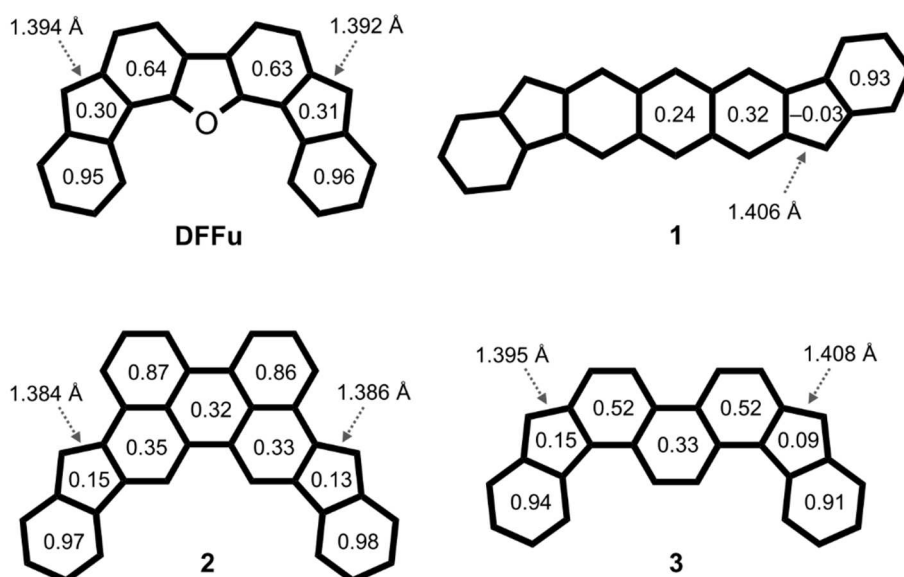

**Figure S4.** HOMA values of the  $\pi$ -conjugated frameworks of **DFFu**, **1**, **2**, and **3** determined by the X-ray crystallographic analyses.

## 4. Electrochemical data

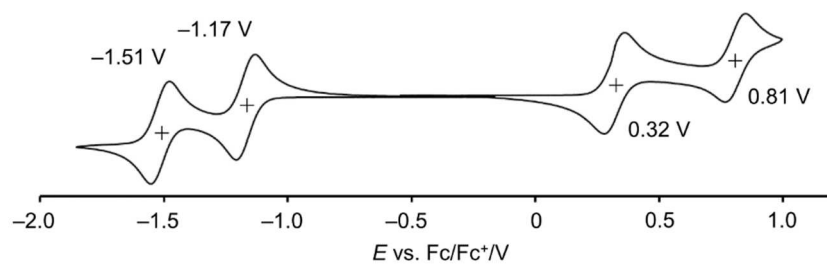

**Figure S5.** Cyclic voltammograms of **DFFu** at scan rate 100 mV s<sup>-1</sup> in CH<sub>2</sub>Cl<sub>2</sub> (0.1 mol L<sup>-1</sup> [(*n*-Bu)<sub>4</sub>N][PF<sub>6</sub>]).

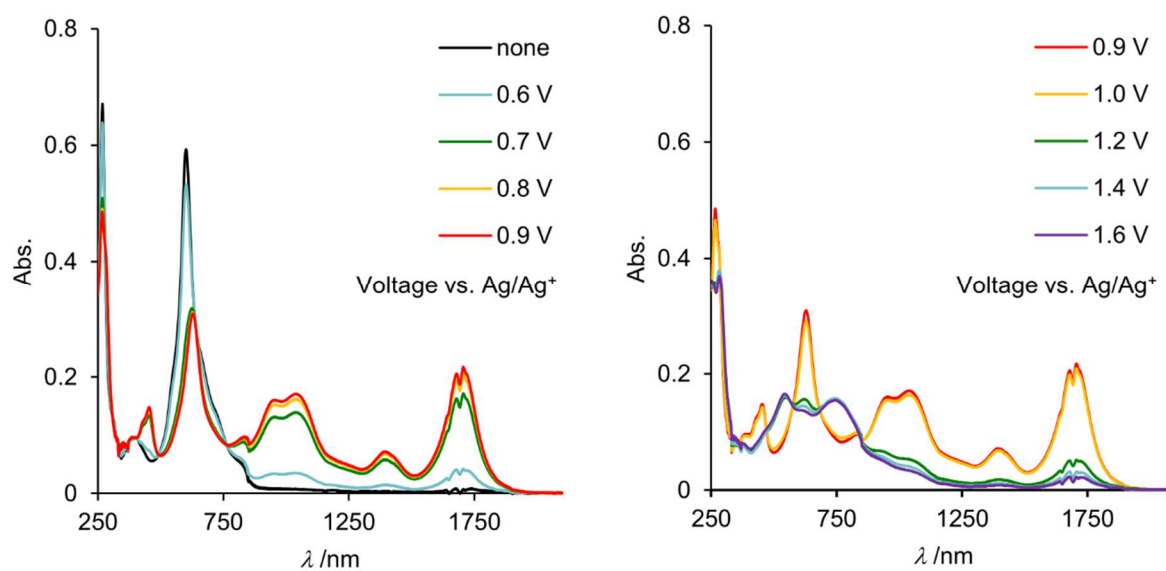

**Figure S6.** UV-vis-NIR spectra obtained during the potentiostatic oxidation of **DFFu** at scan rate 100 mV s<sup>-1</sup> in CH<sub>2</sub>Cl<sub>2</sub> (0.1 mol L<sup>-1</sup> [(*n*-Bu)<sub>4</sub>N][PF<sub>6</sub>]).



## 5. ESR data

The variable-temperature ESR data of **DFFu** (Figure S7) in the solid state were fitted with the following equation:

$$I_{(\text{ESR})} = c \frac{3\exp(-\frac{\Delta E}{k_{\text{B}}T})}{1 + 3\exp(-\frac{\Delta E}{k_{\text{B}}T})} \frac{\exp(\frac{h\nu}{k_{\text{B}}T}) + \exp(-\frac{h\nu}{k_{\text{B}}T})}{1 + \exp(\frac{h\nu}{k_{\text{B}}T}) + \exp(-\frac{h\nu}{k_{\text{B}}T})} \quad (\text{Eq. S1})$$

where,  $I_{(\text{ESR})}$  is the ESR intensity,  $T$  is the temperature,  $c$  is a constant,  $h$  is Planck constant ( $6.626 \times 10^{-34} \text{ J s}^{-1}$ ),  $k_{\text{B}}$  is Boltzmann constant ( $0.695 \text{ cm}^{-1} \text{ K}^{-1}$ ),  $\nu$  is a microwave frequency (9.415 GHz), and  $\Delta E$  is an excitation energy from the singlet ground state to the triplet excited state, i.e.,  $\Delta E = -2J$ :  $2J$  was estimated to be  $-4.3 \text{ kcal/mol}$  ( $1490 \text{ cm}^{-1}$ ). In our experiments,  $h\nu$  is calculated as  $0.314 \text{ cm}^{-1}$ . In Eq. S1, under the condition that  $h\nu \ll k_{\text{B}}T$  ( $0.314 \text{ cm}^{-1}$  vs.  $207 \text{ cm}^{-1}$  at 298 K),  $(1 + h\nu/k_{\text{B}}T)$  is a good approximation for  $\exp(h\nu/k_{\text{B}}T)$ . Accordingly, the following Eq. S2 is derived.

$$I_{(\text{ESR})} = c \frac{3\exp(-\frac{\Delta E}{k_{\text{B}}T})}{1 + 3\exp(-\frac{\Delta E}{k_{\text{B}}T})} \frac{2h\nu}{3k_{\text{B}}T} \quad (\text{Eq. S2})$$

Eq. S2 is equivalent to the following Bleaney–Bowers equation,

$$I_{(\text{ESR})}T = c' \frac{1}{3 + \exp(\frac{\Delta E}{k_{\text{B}}T})} \quad (\text{Eq. S3})$$

and relation between constants  $c$  and  $c'$  is given by

$$c' = c \frac{2h\nu}{k_{\text{B}}}$$

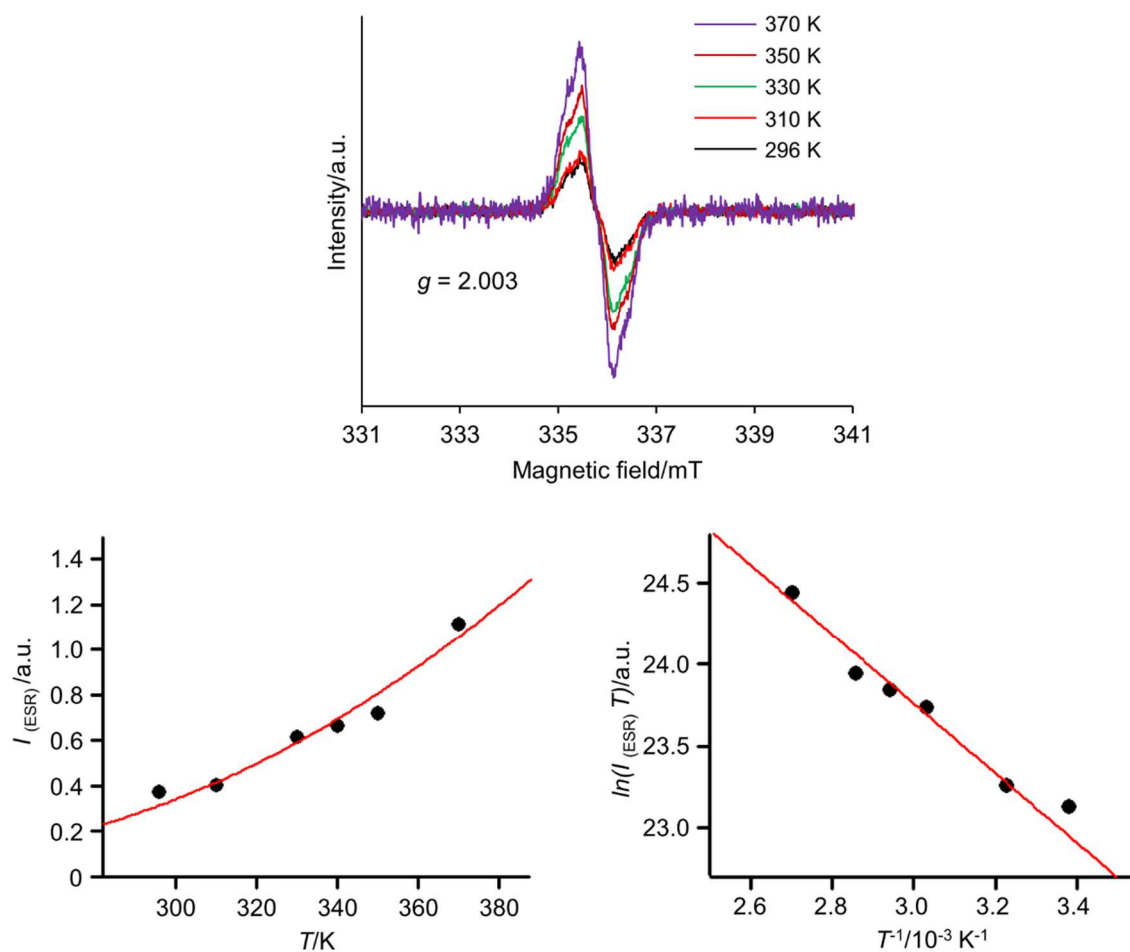

**Figure S7.** VT-ESR spectra of **DFFu** in the solid state (top) as well as fitted  $I_{(ESR)} - T$  (bottom-left) and  $\ln I_{(ESR)}T - T^{-1}$  (bottom-right) plots, where  $I_{(ESR)}$  is the ESR intensity and  $T$  is the temperature.

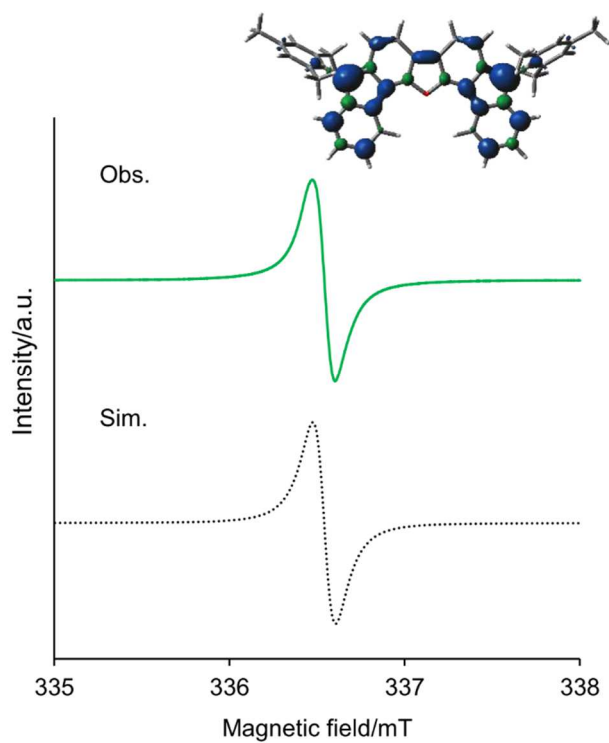

**Figure S8.** Observed ESR spectrum of  $\text{DFFu}^{+\cdot}$  in benzene ( $g = 2.003$ ) at room temperature and its simulation. Spin density distribution of  $\text{DFFu}^{+\cdot}$  calculated at the UB3LYP/6-311G(d) level.

## 6. Theoretical data

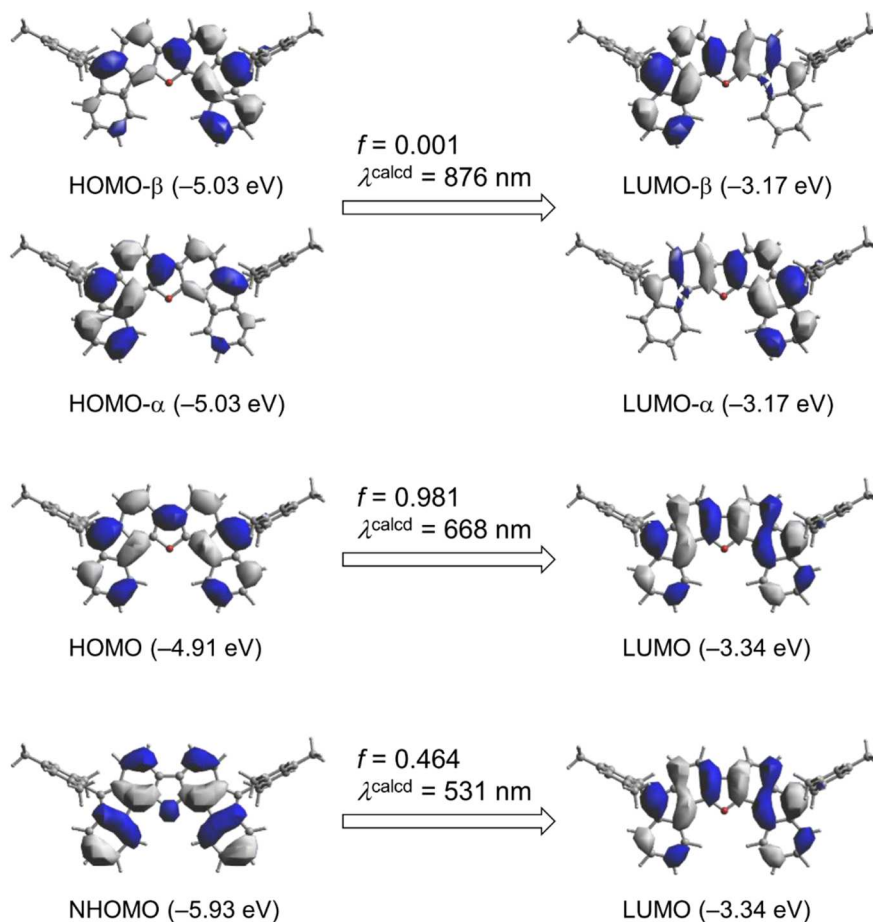

**Figure S9.** FMOs and the calculated absorption wavelengths ( $\lambda^{\text{calcd}}$ ) and oscillator strengths ( $f$ ) of **DFFu** at the (TD)(U)M06-2X/6-311+G(d,p)//(U)B3LYP/6-311G(d) level of theory.

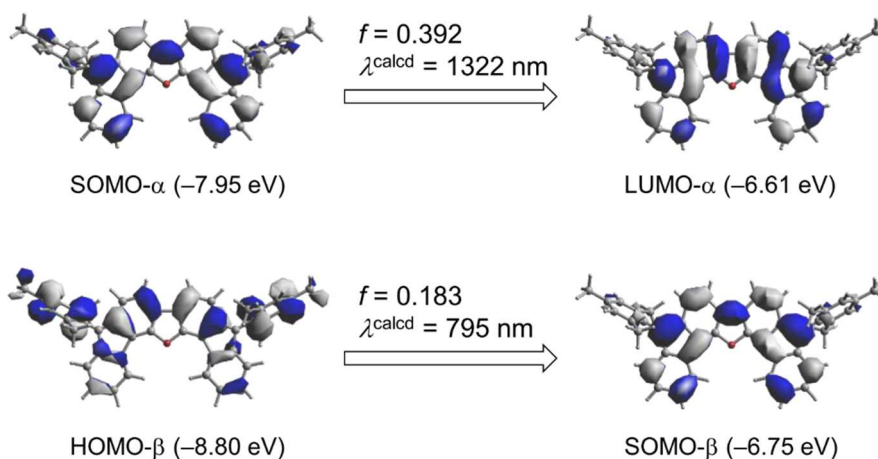

**Figure S10.** FMOs and the calculated absorption wavelengths ( $\lambda^{\text{calcd}}$ ) and oscillator strengths ( $f$ ) of radical cation **DFFu<sup>•+</sup>** at the (TD)UM06-2X/6-311+G(d,p)//UB3LYP/6-311G(d) level of theory.

The open-shell singlet diradical character index  $y$  was calculated based on the natural orbital occupation number (NOON) of the LUMO in spin-unrestricted LC-BLYP calculation using 6-311G(d) basis set.<sup>9</sup> According to the Yamaguchi scheme,<sup>10</sup>  $y$  value is expressed as

$$y = 1 - (2T / (1 + T^2))$$

where  $T$  is the orbital overlap between the corresponding orbital pairs and it can be presented using the NOON of HOMO and LUMO.

$$T = (n_{\text{HOMO}} - n_{\text{LUMO}}) / 2$$

The  $y$  values obtained by this method are listed in Table S1.

**Table S1.** Relative Energies and Open-Shell Singlet Diradical Character Indexes

| Compd                             | $\Delta E$ (OS – CS) <sup>[a]</sup> | $\Delta E$ (S <sub>0</sub> – T <sub>1</sub> ) <sup>[b]</sup> | $y$ <sup>[c]</sup> |
|-----------------------------------|-------------------------------------|--------------------------------------------------------------|--------------------|
| <b>DFFu'</b> <sup>[d]</sup>       | -0.8                                | -5.8                                                         | 0.40               |
| <b>DFFu</b> <sup>[d]</sup>        | -1.1                                | -5.3                                                         | 0.44               |
| <b>DFFu</b> <sup>cryst. [e]</sup> | N/A                                 | N/A                                                          | 0.35               |
| <b>1'</b> <sup>[d]</sup>          | -1.6                                | -5.6                                                         | 0.47               |
| <b>1</b> <sup>cryst. [e]</sup>    | N/A                                 | N/A                                                          | 0.43               |
| <b>2'</b> <sup>[d]</sup>          | 0                                   | -16.3                                                        | 0.05               |
| <b>2</b> <sup>cryst. [e]</sup>    | N/A                                 | N/A                                                          | 0.09               |
| <b>3'</b> <sup>[d]</sup>          | -2.7                                | -3.5                                                         | 0.55               |
| <b>3</b> <sup>cryst. [e]</sup>    | N/A                                 | N/A                                                          | 0.48               |

<sup>[a]</sup> Open-shell singlet energy minus closed-shell singlet energy ((U)B3LYP/6-311G(d)).

<sup>[b]</sup> Open-shell singlet energy minus unrestricted triplet energy ((U)B3LYP/6-311G(d)).

<sup>[c]</sup> Open-shell singlet diradical character index.

<sup>[d]</sup> Optimized at the UB3LYP/6-311G(d) level.

<sup>[e]</sup> X-Ray crystallographic structure.

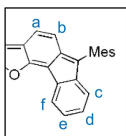

**Table S2.** Observed and Calculated  $^1\text{H}$  Chemical Shifts of **DFFu**

| Positions | Observed <sup>[a,b]</sup> | Calculated <sup>[c]</sup> |                        |
|-----------|---------------------------|---------------------------|------------------------|
|           |                           | B3LYP/6-311G(d,p)         | B3LYP/6-311++G(2d,2pd) |
| a         | 7.10                      | 6.61                      | 7.52                   |
| b         | 6.73                      | 6.39                      | 7.41                   |
| c         | 6.89                      | 6.68                      | 7.49                   |
| d         | 7.11                      | 6.91                      | 7.79                   |
| e         | 7.26                      | 7.05                      | 7.90                   |
| f         | 8.03                      | 7.85                      | 8.36                   |

<sup>[a]</sup> In THF-*d*<sub>8</sub>. <sup>[b]</sup> We assigned all aromatic protons by the NOESY experiment. <sup>[c]</sup> PCM model (THF).

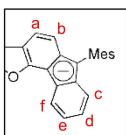

**Table S3.** Observed and Calculated  $^1\text{H}$  Chemical Shifts of **DFFu**<sup>2-</sup>

| Positions | Observed <sup>[a,b]</sup> | Calculated <sup>[c]</sup> |                         |
|-----------|---------------------------|---------------------------|-------------------------|
|           |                           | B3LYP/6-311G(d,p)         | B3LYP/6-311++G(2df,2pd) |
| a         | 7.28                      | 7.85                      | 7.99                    |
| b         | 6.83                      | 7.02                      | 7.29                    |
| c         | 6.95                      | 7.07                      | 7.44                    |
| d         | 6.84                      | 7.25                      | 7.41                    |
| e         | 6.61                      | 7.00                      | 7.13                    |
| f         | 8.66                      | 9.06                      | 9.42                    |

<sup>[a]</sup> In THF-*d*<sub>8</sub>. <sup>[b]</sup> We assigned all aromatic protons by the 1D NOE and  $^1\text{H}$ - $^1\text{H}$  COSY experiments.

<sup>[c]</sup> PCM model (THF).

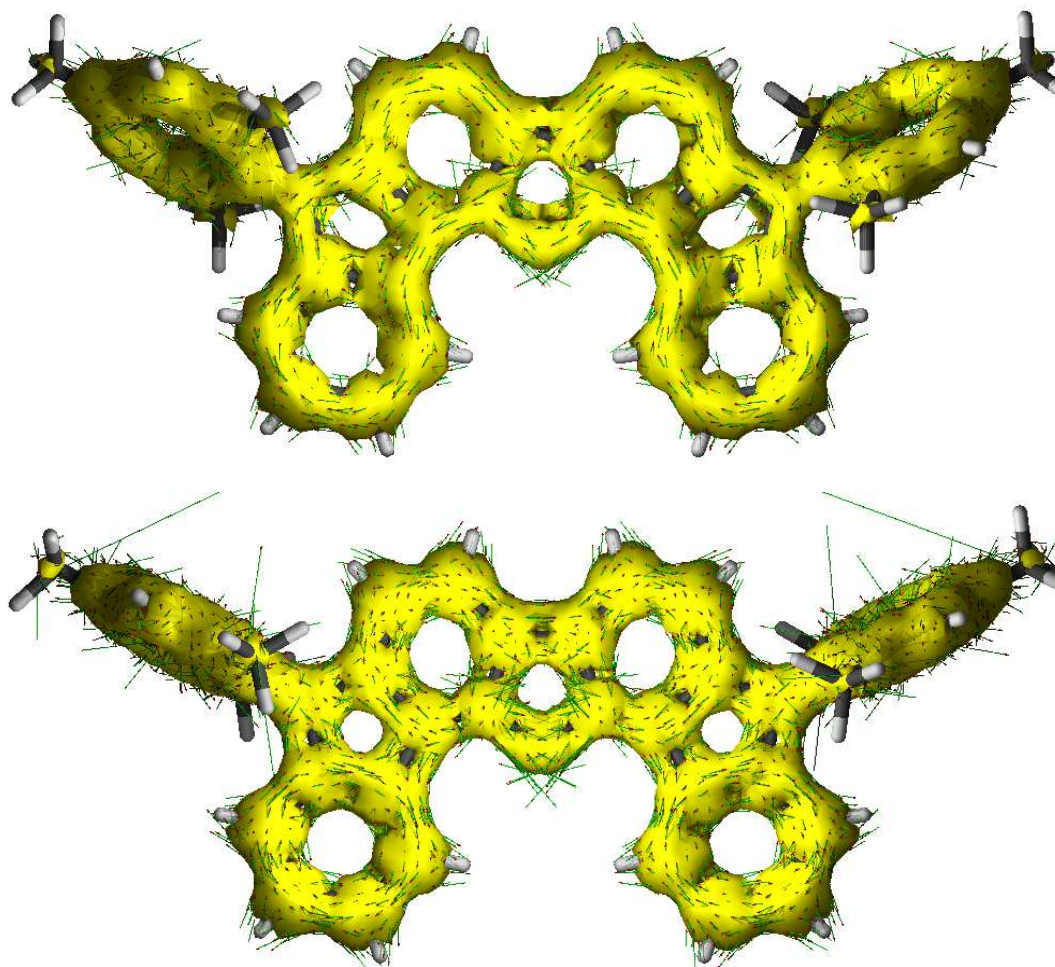

**Figure S11.** ACID plots of  $\text{DFFu}^{2-}$  (top) and  $\text{DFFu}$  (open-shell singlet) (bottom) at the CSGT-(U)B3LYP/6-311+G(d,p)//(U)B3LYP/6-311G(d).

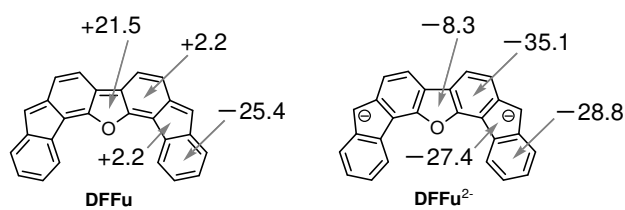

**Figure S12.** NICS(1) values of  $\text{DFFu}'$  and  $\text{DFFu}^{2-}$  calculated at the GIAO-HF/6-311G(d)//B3LYP/6-311G(d).

**Table S4.** Cartesian Coordinates of **DFFu'** (Closed-Shell Singlet) at the B3LYP/6-311G(d) level

| Center Number | Atomic Number | Atomic Type | Coordinates (Angstroms) |           |           |
|---------------|---------------|-------------|-------------------------|-----------|-----------|
|               |               |             | X                       | Y         | Z         |
| 1             | 6             | 0           | -0.697325               | -2.172349 | 0.000010  |
| 2             | 6             | 0           | -1.100265               | -0.790270 | 0.000002  |
| 3             | 8             | 0           | -0.000000               | 0.035797  | -0.000016 |
| 4             | 6             | 0           | 1.100265                | -0.790270 | -0.000001 |
| 5             | 6             | 0           | 0.697324                | -2.172349 | 0.000005  |
| 6             | 6             | 0           | -1.694094               | -3.196786 | 0.000016  |
| 7             | 6             | 0           | -3.014594               | -2.845429 | 0.000015  |
| 8             | 6             | 0           | -3.405031               | -1.467339 | 0.000016  |
| 9             | 6             | 0           | -2.402781               | -0.405515 | 0.000006  |
| 10            | 6             | 0           | 2.402781                | -0.405515 | -0.000000 |
| 11            | 6             | 0           | 3.405031                | -1.467339 | 0.000013  |
| 12            | 6             | 0           | 3.014594                | -2.845430 | 0.000008  |
| 13            | 6             | 0           | 1.694094                | -3.196787 | 0.000009  |
| 14            | 6             | 0           | 3.112081                | 0.867483  | 0.000008  |
| 15            | 6             | 0           | 4.505665                | 0.558443  | 0.000023  |
| 16            | 6             | 0           | 4.656877                | -0.879980 | 0.000084  |
| 17            | 6             | 0           | -4.656877               | -0.879980 | 0.000061  |
| 18            | 6             | 0           | -4.505665               | 0.558443  | -0.000003 |
| 19            | 6             | 0           | -3.112081               | 0.867483  | -0.000005 |
| 20            | 6             | 0           | 2.680926                | 2.186758  | -0.000024 |
| 21            | 6             | 0           | 3.638551                | 3.207592  | -0.000033 |
| 22            | 6             | 0           | 5.004195                | 2.910364  | -0.000015 |
| 23            | 6             | 0           | 5.448576                | 1.587147  | 0.000009  |
| 24            | 6             | 0           | -5.448576               | 1.587147  | -0.000032 |
| 25            | 6             | 0           | -5.004194               | 2.910364  | -0.000058 |
| 26            | 6             | 0           | -3.638551               | 3.207592  | -0.000060 |
| 27            | 6             | 0           | -2.680926               | 2.186758  | -0.000035 |
| 28            | 1             | 0           | -1.395925               | -4.239248 | 0.000029  |
| 29            | 1             | 0           | -3.783295               | -3.611920 | 0.000033  |
| 30            | 1             | 0           | 3.783295                | -3.611920 | 0.000025  |
| 31            | 1             | 0           | 1.395925                | -4.239248 | 0.000018  |
| 32            | 1             | 0           | 5.603864                | -1.406063 | 0.000121  |
| 33            | 1             | 0           | -5.603864               | -1.406062 | 0.000088  |
| 34            | 1             | 0           | 1.622814                | 2.424854  | -0.000048 |
| 35            | 1             | 0           | 3.315860                | 4.243634  | -0.000056 |
| 36            | 1             | 0           | 5.727656                | 3.719322  | -0.000017 |
| 37            | 1             | 0           | 6.511562                | 1.365527  | 0.000035  |
| 38            | 1             | 0           | -6.511561               | 1.365527  | -0.000020 |
| 39            | 1             | 0           | -5.727655               | 3.719322  | -0.000073 |
| 40            | 1             | 0           | -3.315859               | 4.243634  | -0.000084 |
| 41            | 1             | 0           | -1.622814               | 2.424853  | -0.000044 |

No imaginary frequency.

Total energy = -1074.62774404 hartree.

**Table S5.** Cartesian Coordinates of **DFFu'** (Open-Shell Triplet) at the UB3LYP/6-311G(d) level

| Center Number | Atomic Number | Atomic Type | Coordinates (Angstroms) |           |          |
|---------------|---------------|-------------|-------------------------|-----------|----------|
|               |               |             | X                       | Y         | Z        |
| 1             | 6             | 0           | -0.724317               | -2.197808 | 0.000021 |
| 2             | 6             | 0           | -1.101238               | -0.835466 | 0.000009 |
| 3             | 8             | 0           | 0.000000                | -0.007670 | 0.000002 |
| 4             | 6             | 0           | 1.101238                | -0.835466 | 0.000016 |
| 5             | 6             | 0           | 0.724317                | -2.197808 | 0.000024 |
| 6             | 6             | 0           | -1.707167               | -3.197970 | 0.000026 |
| 7             | 6             | 0           | -3.049142               | -2.833205 | 0.000019 |
| 8             | 6             | 0           | -3.409271               | -1.472879 | 0.000009 |
| 9             | 6             | 0           | -2.420613               | -0.436499 | 0.000003 |
| 10            | 6             | 0           | 2.420613                | -0.436499 | 0.000017 |
| 11            | 6             | 0           | 3.409271                | -1.472879 | 0.000028 |
| 12            | 6             | 0           | 3.049142                | -2.833205 | 0.000035 |



|    |   |   |           |           |           |
|----|---|---|-----------|-----------|-----------|
| 13 | 6 | 0 | 1.707167  | -3.197970 | 0.000034  |
| 14 | 6 | 0 | 3.112395  | 0.848802  | 0.000005  |
| 15 | 6 | 0 | 4.518300  | 0.567014  | 0.000011  |
| 16 | 6 | 0 | 4.698319  | -0.847895 | 0.000041  |
| 17 | 6 | 0 | -4.698319 | -0.847895 | 0.000013  |
| 18 | 6 | 0 | -4.518300 | 0.567014  | -0.000015 |
| 19 | 6 | 0 | -3.112395 | 0.848802  | -0.000013 |
| 20 | 6 | 0 | 2.658403  | 2.158053  | -0.000014 |
| 21 | 6 | 0 | 3.597425  | 3.198737  | -0.000027 |
| 22 | 6 | 0 | 4.971666  | 2.932176  | -0.000022 |
| 23 | 6 | 0 | 5.442288  | 1.621718  | -0.000004 |
| 24 | 6 | 0 | -5.442288 | 1.621718  | -0.000035 |
| 25 | 6 | 0 | -4.971665 | 2.932176  | -0.000050 |
| 26 | 6 | 0 | -3.597425 | 3.198738  | -0.000047 |
| 27 | 6 | 0 | -2.658402 | 2.158053  | -0.000030 |
| 28 | 1 | 0 | -1.424611 | -4.245241 | 0.000036  |
| 29 | 1 | 0 | -3.819284 | -3.597754 | 0.000026  |
| 30 | 1 | 0 | 3.819284  | -3.597755 | 0.000046  |
| 31 | 1 | 0 | 1.424611  | -4.245241 | 0.000043  |
| 32 | 1 | 0 | 5.649046  | -1.366099 | 0.000055  |
| 33 | 1 | 0 | -5.649046 | -1.366098 | 0.000021  |
| 34 | 1 | 0 | 1.596195  | 2.376630  | -0.000021 |
| 35 | 1 | 0 | 3.252793  | 4.227752  | -0.000042 |
| 36 | 1 | 0 | 5.676452  | 3.757284  | -0.000030 |
| 37 | 1 | 0 | 6.509312  | 1.420607  | 0.000004  |
| 38 | 1 | 0 | -6.509312 | 1.420607  | -0.000033 |
| 39 | 1 | 0 | -5.676452 | 3.757284  | -0.000062 |
| 40 | 1 | 0 | -3.252793 | 4.227752  | -0.000060 |
| 41 | 1 | 0 | -1.596195 | 2.376630  | -0.000030 |

No imaginary frequency.

Total energy = -1074.61974663 hartree.

**Table S6.** Cartesian Coordinates of **DFFu'** (Open-Shell Singlet) at the UB3LYP/6-311G(d) level

| Center<br>Number | Atomic<br>Number | Atomic<br>Type | Coordinates (Angstroms) |           |           |
|------------------|------------------|----------------|-------------------------|-----------|-----------|
|                  |                  |                | X                       | Y         | Z         |
| 1                | 6                | 0              | -0.706744               | -2.182152 | 0.000022  |
| 2                | 6                | 0              | -1.099992               | -0.807449 | 0.000011  |
| 3                | 8                | 0              | 0.000000                | 0.019643  | 0.000005  |
| 4                | 6                | 0              | 1.099992                | -0.807449 | 0.000018  |
| 5                | 6                | 0              | 0.706744                | -2.182152 | 0.000026  |
| 6                | 6                | 0              | -1.698343               | -3.197525 | 0.000026  |
| 7                | 6                | 0              | -3.026434               | -2.841352 | 0.000020  |
| 8                | 6                | 0              | -3.406059               | -1.469558 | 0.000010  |
| 9                | 6                | 0              | -2.408617               | -0.417648 | 0.000005  |
| 10               | 6                | 0              | 2.408617                | -0.417648 | 0.000019  |
| 11               | 6                | 0              | 3.406059                | -1.469558 | 0.000029  |
| 12               | 6                | 0              | 3.026434                | -2.841352 | 0.000036  |
| 13               | 6                | 0              | 1.698343                | -3.197525 | 0.000035  |
| 14               | 6                | 0              | 3.110845                | 0.861241  | 0.000006  |
| 15               | 6                | 0              | 4.508150                | 0.562783  | 0.000009  |
| 16               | 6                | 0              | 4.669632                | -0.869256 | 0.000038  |
| 17               | 6                | 0              | -4.669632               | -0.869256 | 0.000010  |
| 18               | 6                | 0              | -4.508150               | 0.562783  | -0.000017 |
| 19               | 6                | 0              | -3.110845               | 0.861242  | -0.000012 |
| 20               | 6                | 0              | 2.670391                | 2.176339  | -0.000012 |
| 21               | 6                | 0              | 3.620833                | 3.205120  | -0.000026 |
| 22               | 6                | 0              | 4.989012                | 2.919411  | -0.000023 |
| 23               | 6                | 0              | 5.443496                | 1.600210  | -0.000007 |
| 24               | 6                | 0              | -5.443496               | 1.600210  | -0.000037 |
| 25               | 6                | 0              | -4.989011               | 2.919411  | -0.000051 |
| 26               | 6                | 0              | -3.620833               | 3.205120  | -0.000046 |
| 27               | 6                | 0              | -2.670391               | 2.176339  | -0.000027 |
| 28               | 1                | 0              | -1.405987               | -4.241789 | 0.000036  |
| 29               | 1                | 0              | -3.795660               | -3.607160 | 0.000026  |

|    |   |   |           |           |           |
|----|---|---|-----------|-----------|-----------|
| 30 | 1 | 0 | 3.795660  | -3.607160 | 0.000047  |
| 31 | 1 | 0 | 1.405987  | -4.241789 | 0.000043  |
| 32 | 1 | 0 | 5.617877  | -1.392752 | 0.000050  |
| 33 | 1 | 0 | -5.617877 | -1.392751 | 0.000016  |
| 34 | 1 | 0 | 1.610579  | 2.406663  | -0.000016 |
| 35 | 1 | 0 | 3.289609  | 4.238495  | -0.000039 |
| 36 | 1 | 0 | 5.705700  | 3.734331  | -0.000032 |
| 37 | 1 | 0 | 6.508066  | 1.386346  | -0.000002 |
| 38 | 1 | 0 | -6.508066 | 1.386346  | -0.000038 |
| 39 | 1 | 0 | -5.705700 | 3.734332  | -0.000065 |
| 40 | 1 | 0 | -3.289609 | 4.238495  | -0.000058 |
| 41 | 1 | 0 | -1.610579 | 2.406664  | -0.000026 |

-----  
No imaginary frequency.

Total energy = -1074.62902008 hartree.

**Table S7.** Cartesian Coordinates of **DFFu** (Closed-Shell Singlet) at the B3LYP/6-311G(d) level

| Center<br>Number | Atomic<br>Number | Atomic<br>Type | Coordinates (Angstroms) |           |           |
|------------------|------------------|----------------|-------------------------|-----------|-----------|
|                  |                  |                | X                       | Y         | Z         |
| 1                | 6                | 0              | 0.698175                | -1.216704 | 0.001772  |
| 2                | 6                | 0              | 1.100155                | 0.164446  | 0.001984  |
| 3                | 8                | 0              | -0.000096               | 0.990960  | 0.002766  |
| 4                | 6                | 0              | -1.100193               | 0.164247  | 0.003583  |
| 5                | 6                | 0              | -0.697970               | -1.216830 | 0.004023  |
| 6                | 6                | 0              | 1.696425                | -2.238660 | 0.001198  |
| 7                | 6                | 0              | 3.017696                | -1.885501 | 0.000506  |
| 8                | 6                | 0              | 3.405873                | -0.507444 | -0.001343 |
| 9                | 6                | 0              | 2.403103                | 0.549919  | 0.002589  |
| 10               | 6                | 0              | -2.403216               | 0.549472  | 0.002314  |
| 11               | 6                | 0              | -3.405799               | -0.508048 | 0.005521  |
| 12               | 6                | 0              | -3.017383               | -1.886030 | 0.004049  |
| 13               | 6                | 0              | -1.696044               | -2.238954 | 0.004207  |
| 14               | 6                | 0              | -3.108573               | 1.823051  | -0.002223 |
| 15               | 6                | 0              | -4.500796               | 1.517265  | -0.003644 |
| 16               | 6                | 0              | -4.670441               | 0.070283  | 0.001965  |
| 17               | 6                | 0              | 4.670408                | 0.071097  | 0.000203  |
| 18               | 6                | 0              | 4.500521                | 1.518059  | 0.005278  |
| 19               | 6                | 0              | 3.108261                | 1.823615  | 0.005596  |
| 20               | 6                | 0              | -2.674816               | 3.141815  | -0.001105 |
| 21               | 6                | 0              | -3.630284               | 4.164378  | -0.001154 |
| 22               | 6                | 0              | -4.996474               | 3.869286  | 0.000433  |
| 23               | 6                | 0              | -5.443148               | 2.546530  | 0.000835  |
| 24               | 6                | 0              | 5.442725                | 2.547437  | -0.000987 |
| 25               | 6                | 0              | 4.995845                | 3.870130  | -0.000696 |
| 26               | 6                | 0              | 3.629614                | 4.165014  | 0.002599  |
| 27               | 6                | 0              | 2.674294                | 3.142309  | 0.004408  |
| 28               | 6                | 0              | 5.974658                | -0.636224 | -0.011570 |
| 29               | 6                | 0              | 6.685988                | -0.825999 | 1.191295  |
| 30               | 6                | 0              | 7.918161                | -1.480397 | 1.154500  |
| 31               | 6                | 0              | 8.469288                | -1.952445 | -0.037410 |
| 32               | 6                | 0              | 7.752380                | -1.749128 | -1.216048 |
| 33               | 6                | 0              | 6.515151                | -1.101042 | -1.227183 |
| 34               | 6                | 0              | 5.785187                | -0.896402 | -2.534446 |
| 35               | 6                | 0              | 6.126663                | -0.343988 | 2.509395  |
| 36               | 6                | 0              | 9.789779                | -2.683774 | -0.044492 |
| 37               | 6                | 0              | -5.974669               | -0.637085 | 0.011171  |
| 38               | 6                | 0              | -6.682985               | -0.827438 | -1.193909 |
| 39               | 6                | 0              | -7.911438               | -1.488028 | -1.161217 |
| 40               | 6                | 0              | -8.464266               | -1.962966 | 0.029280  |
| 41               | 6                | 0              | -7.748207               | -1.764103 | 1.208637  |
| 42               | 6                | 0              | -6.513885               | -1.109602 | 1.223879  |
| 43               | 6                | 0              | -5.783118               | -0.913795 | 2.532064  |
| 44               | 6                | 0              | -6.119538               | -0.346280 | -2.510568 |
| 45               | 6                | 0              | -9.809459               | -2.647956 | 0.037119  |
| 46               | 1                | 0              | 1.400616                | -3.281907 | 0.003275  |

|    |   |   |            |           |           |
|----|---|---|------------|-----------|-----------|
| 47 | 1 | 0 | 3.789696   | -2.648186 | 0.003468  |
| 48 | 1 | 0 | -3.789223  | -2.648877 | 0.000467  |
| 49 | 1 | 0 | -1.400070  | -3.282154 | 0.002208  |
| 50 | 1 | 0 | -1.616067  | 3.377228  | 0.000828  |
| 51 | 1 | 0 | -3.305576  | 5.199868  | -0.000832 |
| 52 | 1 | 0 | -5.718832  | 4.679330  | 0.002776  |
| 53 | 1 | 0 | -6.505119  | 2.321757  | 0.006133  |
| 54 | 1 | 0 | 6.504724   | 2.322823  | -0.007593 |
| 55 | 1 | 0 | 5.718085   | 4.680270  | -0.004431 |
| 56 | 1 | 0 | 3.304748   | 5.200454  | 0.002160  |
| 57 | 1 | 0 | 1.615507   | 3.377563  | 0.003785  |
| 58 | 1 | 0 | 8.462013   | -1.625780 | 2.084709  |
| 59 | 1 | 0 | 8.168036   | -2.099474 | -2.157538 |
| 60 | 1 | 0 | 4.845340   | -1.455153 | -2.566352 |
| 61 | 1 | 0 | 6.395300   | -1.224839 | -3.378251 |
| 62 | 1 | 0 | 5.529488   | 0.154801  | -2.693650 |
| 63 | 1 | 0 | 6.799381   | -0.589134 | 3.333672  |
| 64 | 1 | 0 | 5.155051   | -0.798735 | 2.723107  |
| 65 | 1 | 0 | 5.972338   | 0.738688  | 2.514228  |
| 66 | 1 | 0 | 9.652905   | -3.750875 | 0.163561  |
| 67 | 1 | 0 | 10.470449  | -2.292570 | 0.715908  |
| 68 | 1 | 0 | 10.288725  | -2.604579 | -1.013207 |
| 69 | 1 | 0 | -8.450082  | -1.638819 | -2.093675 |
| 70 | 1 | 0 | -8.160579  | -2.125301 | 2.147385  |
| 71 | 1 | 0 | -4.847490  | -1.479728 | 2.563466  |
| 72 | 1 | 0 | -6.396274  | -1.239544 | 3.374713  |
| 73 | 1 | 0 | -5.519664  | 0.135035  | 2.693806  |
| 74 | 1 | 0 | -5.963161  | 0.736075  | -2.514477 |
| 75 | 1 | 0 | -6.790909  | -0.589691 | -3.336452 |
| 76 | 1 | 0 | -5.148265  | -0.802732 | -2.722334 |
| 77 | 1 | 0 | -9.926206  | -3.314515 | -0.821610 |
| 78 | 1 | 0 | -9.953984  | -3.241230 | 0.942823  |
| 79 | 1 | 0 | -10.626013 | -1.918897 | -0.008654 |

No imaginary frequency.

Total energy = -1772.77937663 hartree.

**Table S8.** Cartesian Coordinates of **DFFu** (Open-Shell Triplet) at the UB3LYP/6-311G(d) level

| Center<br>Number | Atomic<br>Number | Atomic<br>Type | Coordinates (Angstroms) |           |           |
|------------------|------------------|----------------|-------------------------|-----------|-----------|
|                  |                  |                | X                       | Y         | Z         |
| 1                | 6                | 0              | 0.724524                | -1.253589 | 0.001439  |
| 2                | 6                | 0              | 1.101184                | 0.108217  | 0.000769  |
| 3                | 8                | 0              | -0.000023               | 0.936294  | 0.003022  |
| 4                | 6                | 0              | -1.100957               | 0.107857  | 0.005280  |
| 5                | 6                | 0              | -0.723856               | -1.253827 | 0.004929  |
| 6                | 6                | 0              | 1.709048                | -2.252442 | 0.000962  |
| 7                | 6                | 0              | 3.050971                | -1.886592 | -0.001320 |
| 8                | 6                | 0              | 3.409032                | -0.525908 | -0.005241 |
| 9                | 6                | 0              | 2.420919                | 0.507934  | -0.000560 |
| 10               | 6                | 0              | -2.420825               | 0.507139  | 0.005819  |
| 11               | 6                | 0              | -3.408597               | -0.527027 | 0.009905  |
| 12               | 6                | 0              | -3.050100               | -1.887602 | 0.006496  |
| 13               | 6                | 0              | -1.708053               | -2.253006 | 0.005075  |
| 14               | 6                | 0              | -3.110422               | 1.791954  | -0.001916 |
| 15               | 6                | 0              | -4.513958               | 1.512724  | -0.005468 |
| 16               | 6                | 0              | -4.712509               | 0.089770  | 0.003322  |
| 17               | 6                | 0              | 4.712755                | 0.091341  | -0.000321 |
| 18               | 6                | 0              | 4.513719                | 1.514228  | 0.008014  |
| 19               | 6                | 0              | 3.110095                | 1.792981  | 0.005918  |
| 20               | 6                | 0              | -2.653690               | 3.101190  | -0.002121 |
| 21               | 6                | 0              | -3.590141               | 4.143171  | -0.005458 |
| 22               | 6                | 0              | -4.964667               | 3.877728  | -0.005214 |
| 23               | 6                | 0              | -5.437165               | 2.567418  | -0.003221 |
| 24               | 6                | 0              | 5.436563                | 2.569242  | 0.003715  |
| 25               | 6                | 0              | 4.963610                | 3.879388  | 0.005293  |

|    |   |   |            |           |           |
|----|---|---|------------|-----------|-----------|
| 26 | 6 | 0 | 3.588992   | 4.144363  | 0.007105  |
| 27 | 6 | 0 | 2.652901   | 3.102058  | 0.005703  |
| 28 | 6 | 0 | 6.015012   | -0.614004 | -0.009100 |
| 29 | 6 | 0 | 6.739173   | -0.777494 | 1.189728  |
| 30 | 6 | 0 | 7.967631   | -1.439515 | 1.154796  |
| 31 | 6 | 0 | 8.501831   | -1.944802 | -0.030769 |
| 32 | 6 | 0 | 7.771203   | -1.768754 | -1.206005 |
| 33 | 6 | 0 | 6.537459   | -1.115592 | -1.218851 |
| 34 | 6 | 0 | 5.792315   | -0.936535 | -2.521134 |
| 35 | 6 | 0 | 6.198164   | -0.259370 | 2.502025  |
| 36 | 6 | 0 | 9.817861   | -2.684042 | -0.036612 |
| 37 | 6 | 0 | -6.014749  | -0.615669 | 0.009096  |
| 38 | 6 | 0 | -6.733194  | -0.783806 | -1.193275 |
| 39 | 6 | 0 | -7.958022  | -1.451397 | -1.163135 |
| 40 | 6 | 0 | -8.496928  | -1.955209 | 0.021690  |
| 41 | 6 | 0 | -7.769751  | -1.779972 | 1.198399  |
| 42 | 6 | 0 | -6.538615  | -1.120642 | 1.216057  |
| 43 | 6 | 0 | -5.795342  | -0.946443 | 2.520077  |
| 44 | 6 | 0 | -6.184773  | -0.270970 | -2.504553 |
| 45 | 6 | 0 | -9.838983  | -2.646221 | 0.028311  |
| 46 | 1 | 0 | 1.427735   | -3.300145 | 0.003941  |
| 47 | 1 | 0 | 3.825082   | -2.646731 | 0.002572  |
| 48 | 1 | 0 | -3.823960  | -2.647997 | 0.002132  |
| 49 | 1 | 0 | -1.426401  | -3.300618 | 0.002351  |
| 50 | 1 | 0 | -1.590846  | 3.316902  | 0.001474  |
| 51 | 1 | 0 | -3.244080  | 5.171757  | -0.006212 |
| 52 | 1 | 0 | -5.668811  | 4.703515  | -0.004766 |
| 53 | 1 | 0 | -6.503255  | 2.363252  | 0.002359  |
| 54 | 1 | 0 | 6.502720   | 2.365464  | -0.003234 |
| 55 | 1 | 0 | 5.667475   | 4.705410  | 0.003246  |
| 56 | 1 | 0 | 3.242582   | 5.172832  | 0.007474  |
| 57 | 1 | 0 | 1.589977   | 3.317393  | 0.003136  |
| 58 | 1 | 0 | 8.521115   | -1.565229 | 2.082137  |
| 59 | 1 | 0 | 8.173589   | -2.145606 | -2.143071 |
| 60 | 1 | 0 | 4.831715   | -1.459630 | -2.514358 |
| 61 | 1 | 0 | 6.374163   | -1.320596 | -3.361330 |
| 62 | 1 | 0 | 5.573852   | 0.116847  | -2.718207 |
| 63 | 1 | 0 | 6.849114   | -0.540607 | 3.332217  |
| 64 | 1 | 0 | 5.200107   | -0.655668 | 2.709412  |
| 65 | 1 | 0 | 6.108673   | 0.830747  | 2.503126  |
| 66 | 1 | 0 | 9.671033   | -3.755251 | 0.141280  |
| 67 | 1 | 0 | 10.489320  | -2.316790 | 0.743418  |
| 68 | 1 | 0 | 10.331673  | -2.583630 | -0.995712 |
| 69 | 1 | 0 | -8.504149  | -1.585766 | -2.093728 |
| 70 | 1 | 0 | -8.170707  | -2.164664 | 2.132779  |
| 71 | 1 | 0 | -4.836771  | -1.473329 | 2.514793  |
| 72 | 1 | 0 | -6.380496  | -1.329069 | 3.358629  |
| 73 | 1 | 0 | -5.573168  | 0.105816  | 2.718812  |
| 74 | 1 | 0 | -6.089119  | 0.818584  | -2.506752 |
| 75 | 1 | 0 | -6.834639  | -0.549651 | -3.336452 |
| 76 | 1 | 0 | -5.188252  | -0.673175 | -2.708194 |
| 77 | 1 | 0 | -9.975222  | -3.268461 | -0.860127 |
| 78 | 1 | 0 | -9.958507  | -3.285422 | 0.906010  |
| 79 | 1 | 0 | -10.658747 | -1.919387 | 0.040770  |

No imaginary frequency.

Total energy = -1772.77268195 hartree.

**Table S9.** Cartesian Coordinates of **DFFu** (Open-Shell Singlet) at the UB3LYP/6-311G(d) level

| Center Number | Atomic Number | Atomic Type | Coordinates (Angstroms) |           |           |
|---------------|---------------|-------------|-------------------------|-----------|-----------|
|               |               |             | X                       | Y         | Z         |
| 1             | 6             | 0           | -0.708971               | -1.231793 | -0.004113 |
| 2             | 6             | 0           | -1.100202               | 0.140942  | -0.002325 |
| 3             | 8             | 0           | 0.000021                | 0.968476  | -0.002350 |
| 4             | 6             | 0           | 1.099996                | 0.140618  | -0.004245 |

|    |   |   |            |           |           |
|----|---|---|------------|-----------|-----------|
| 5  | 6 | 0 | 0.708364   | -1.232003 | -0.006010 |
| 6  | 6 | 0 | -1.701371  | -2.243872 | -0.005000 |
| 7  | 6 | 0 | -3.031081  | -1.885498 | -0.003473 |
| 8  | 6 | 0 | -3.406951  | -0.514569 | 0.000746  |
| 9  | 6 | 0 | -2.410184  | 0.532456  | -0.001450 |
| 10 | 6 | 0 | 2.410096   | 0.531739  | -0.003247 |
| 11 | 6 | 0 | 3.406556   | -0.515577 | -0.006998 |
| 12 | 6 | 0 | 3.030286   | -1.886412 | -0.006725 |
| 13 | 6 | 0 | 1.700464   | -2.244379 | -0.007125 |
| 14 | 6 | 0 | 3.108244   | 1.811249  | 0.002061  |
| 15 | 6 | 0 | 4.504314   | 1.517033  | 0.003119  |
| 16 | 6 | 0 | 4.685452   | 0.077605  | -0.003145 |
| 17 | 6 | 0 | -4.685691  | 0.079001  | 0.000398  |
| 18 | 6 | 0 | -4.504104  | 1.518395  | -0.002189 |
| 19 | 6 | 0 | -3.107956  | 1.812180  | -0.002331 |
| 20 | 6 | 0 | 2.664373   | 3.125743  | 0.002390  |
| 21 | 6 | 0 | 3.612004   | 4.156675  | 0.003488  |
| 22 | 6 | 0 | 4.981045   | 3.873946  | 0.001769  |
| 23 | 6 | 0 | 5.438608   | 2.555565  | 0.000076  |
| 24 | 6 | 0 | -5.438065  | 2.557208  | 0.005519  |
| 25 | 6 | 0 | -4.980085  | 3.875445  | 0.007060  |
| 26 | 6 | 0 | -3.610957  | 4.157757  | 0.004032  |
| 27 | 6 | 0 | -2.663660  | 3.126532  | 0.000604  |
| 28 | 6 | 0 | -5.990275  | -0.626180 | 0.010114  |
| 29 | 6 | 0 | -6.697128  | -0.820274 | -1.194137 |
| 30 | 6 | 0 | -7.929293  | -1.475419 | -1.159045 |
| 31 | 6 | 0 | -8.483336  | -1.944496 | 0.032351  |
| 32 | 6 | 0 | -7.769837  | -1.737482 | 1.212869  |
| 33 | 6 | 0 | -6.533573  | -1.088492 | 1.225734  |
| 34 | 6 | 0 | -5.806245  | -0.878421 | 2.533545  |
| 35 | 6 | 0 | -6.134045  | -0.340804 | -2.511685 |
| 36 | 6 | 0 | -9.802915  | -2.677450 | 0.039251  |
| 37 | 6 | 0 | 5.990082   | -0.627557 | -0.010970 |
| 38 | 6 | 0 | 6.689521   | -0.831378 | 1.196638  |
| 39 | 6 | 0 | 7.918193   | -1.492021 | 1.165010  |
| 40 | 6 | 0 | 8.478653   | -1.954374 | -0.026678 |
| 41 | 6 | 0 | 7.770249   | -1.743091 | -1.208821 |
| 42 | 6 | 0 | 6.536578   | -1.088031 | -1.225164 |
| 43 | 6 | 0 | 5.812799   | -0.877248 | -2.534831 |
| 44 | 6 | 0 | 6.117579   | -0.362305 | 2.514095  |
| 45 | 6 | 0 | 9.824214   | -2.638648 | -0.034107 |
| 46 | 1 | 0 | -1.411612  | -3.288986 | -0.008444 |
| 47 | 1 | 0 | -3.804023  | -2.647063 | -0.007211 |
| 48 | 1 | 0 | 3.802980   | -2.648239 | -0.004351 |
| 49 | 1 | 0 | 1.410398   | -3.289414 | -0.006545 |
| 50 | 1 | 0 | 1.603834   | 3.352751  | 0.000820  |
| 51 | 1 | 0 | 3.278243   | 5.189302  | 0.004202  |
| 52 | 1 | 0 | 5.696107   | 4.690387  | 0.000440  |
| 53 | 1 | 0 | 6.502315   | 2.339227  | -0.005072 |
| 54 | 1 | 0 | -6.501837  | 2.341212  | 0.011832  |
| 55 | 1 | 0 | -5.694892  | 4.692092  | 0.012005  |
| 56 | 1 | 0 | -3.276877  | 5.190278  | 0.005922  |
| 57 | 1 | 0 | -1.603044  | 3.353191  | 0.001333  |
| 58 | 1 | 0 | -8.470202  | -1.623732 | -2.090472 |
| 59 | 1 | 0 | -8.187828  | -2.086016 | 2.154044  |
| 60 | 1 | 0 | -4.854610  | -1.417021 | 2.559243  |
| 61 | 1 | 0 | -6.407763  | -1.225781 | 3.375893  |
| 62 | 1 | 0 | -5.573194  | 0.177015  | 2.700220  |
| 63 | 1 | 0 | -6.799561  | -0.596510 | -3.338571 |
| 64 | 1 | 0 | -5.157230  | -0.788151 | -2.717215 |
| 65 | 1 | 0 | -5.989702  | 0.743250  | -2.521591 |
| 66 | 1 | 0 | -9.659399  | -3.752834 | -0.114545 |
| 67 | 1 | 0 | -10.464005 | -2.323672 | -0.755754 |
| 68 | 1 | 0 | -10.326799 | -2.554443 | 0.990226  |
| 69 | 1 | 0 | 8.450507   | -1.652957 | 2.099385  |
| 70 | 1 | 0 | 8.188208   | -2.095391 | -2.148509 |
| 71 | 1 | 0 | 4.862474   | -1.417987 | -2.564798 |
| 72 | 1 | 0 | 6.417842   | -1.221264 | -3.376025 |
| 73 | 1 | 0 | 5.577889   | 0.178000  | -2.699939 |

|    |   |   |           |           |           |
|----|---|---|-----------|-----------|-----------|
| 74 | 1 | 0 | 5.968317  | 0.721003  | 2.529165  |
| 75 | 1 | 0 | 6.780257  | -0.619536 | 3.342784  |
| 76 | 1 | 0 | 5.141749  | -0.815087 | 2.712455  |
| 77 | 1 | 0 | 9.951946  | -3.283999 | 0.838947  |
| 78 | 1 | 0 | 9.958424  | -3.253368 | -0.927079 |
| 79 | 1 | 0 | 10.640454 | -1.907952 | -0.016313 |

No imaginary frequency.

Total energy = -1772.78109203 hartree.

**Table S10.** Cartesian Coordinates of **DFFu<sup>+</sup>** at the UB3LYP/6-311G(d) level

| Center<br>Number | Atomic<br>Number | Atomic<br>Type | Coordinates (Angstroms) |           |           |
|------------------|------------------|----------------|-------------------------|-----------|-----------|
|                  |                  |                | X                       | Y         | Z         |
| 1                | 6                | 0              | -0.709591               | -1.210176 | 0.006644  |
| 2                | 6                | 0              | -1.097810               | 0.166408  | 0.011081  |
| 3                | 8                | 0              | 0.000082                | 0.993053  | -0.002232 |
| 4                | 6                | 0              | 1.097933                | 0.166346  | -0.015722 |
| 5                | 6                | 0              | 0.709626                | -1.210217 | -0.011811 |
| 6                | 6                | 0              | -1.690783               | -2.225642 | 0.007426  |
| 7                | 6                | 0              | -3.023324               | -1.866497 | 0.016870  |
| 8                | 6                | 0              | -3.389896               | -0.499254 | 0.034849  |
| 9                | 6                | 0              | -2.408306               | 0.550321  | 0.019470  |
| 10               | 6                | 0              | 2.408459                | 0.550182  | -0.023362 |
| 11               | 6                | 0              | 3.389984                | -0.499460 | -0.038444 |
| 12               | 6                | 0              | 3.023316                | -1.866694 | -0.021086 |
| 13               | 6                | 0              | 1.690748                | -2.225746 | -0.012440 |
| 14               | 6                | 0              | 3.120198                | 1.832185  | -0.001129 |
| 15               | 6                | 0              | 4.511257                | 1.527529  | 0.014879  |
| 16               | 6                | 0              | 4.684714                | 0.089106  | -0.013901 |
| 17               | 6                | 0              | -4.684601               | 0.089433  | 0.011982  |
| 18               | 6                | 0              | -4.511050               | 1.527881  | -0.015806 |
| 19               | 6                | 0              | -3.119952               | 1.832398  | -0.001151 |
| 20               | 6                | 0              | 2.687842                | 3.143385  | -0.014090 |
| 21               | 6                | 0              | 3.653269                | 4.167226  | -0.012205 |
| 22               | 6                | 0              | 5.016648                | 3.876298  | -0.010491 |
| 23               | 6                | 0              | 5.460072                | 2.550974  | -0.003569 |
| 24               | 6                | 0              | -5.459741               | 2.551399  | 0.005278  |
| 25               | 6                | 0              | -5.016177               | 3.876670  | 0.013188  |
| 26               | 6                | 0              | -3.652771               | 4.167473  | 0.013323  |
| 27               | 6                | 0              | -2.687442               | 3.143538  | 0.012772  |
| 28               | 6                | 0              | -5.969814               | -0.626252 | 0.027825  |
| 29               | 6                | 0              | -6.791734               | -0.624636 | -1.124554 |
| 30               | 6                | 0              | -8.002931               | -1.311266 | -1.080393 |
| 31               | 6                | 0              | -8.439287               | -1.979556 | 0.065983  |
| 32               | 6                | 0              | -7.616434               | -1.954161 | 1.192980  |
| 33               | 6                | 0              | -6.383763               | -1.302698 | 1.198952  |
| 34               | 6                | 0              | -5.561832               | -1.281950 | 2.468650  |
| 35               | 6                | 0              | -6.363823               | 0.049144  | -2.408908 |
| 36               | 6                | 0              | -9.749038               | -2.724710 | 0.074786  |
| 37               | 6                | 0              | 5.969946                | -0.626631 | -0.027755 |
| 38               | 6                | 0              | 6.787219                | -0.629216 | 1.127919  |
| 39               | 6                | 0              | 7.994727                | -1.322692 | 1.088791  |
| 40               | 6                | 0              | 8.433539                | -1.990607 | -0.056866 |
| 41               | 6                | 0              | 7.613335                | -1.964728 | -1.185726 |
| 42               | 6                | 0              | 6.384445                | -1.306320 | -1.196807 |
| 43               | 6                | 0              | 5.564128                | -1.287841 | -2.467568 |
| 44               | 6                | 0              | 6.354634                | 0.041459  | 2.412331  |
| 45               | 6                | 0              | 9.765648                | -2.694818 | -0.078654 |
| 46               | 1                | 0              | -1.399730               | -3.269314 | -0.007534 |
| 47               | 1                | 0              | -3.796723               | -2.626021 | 0.002326  |
| 48               | 1                | 0              | 3.796641                | -2.626282 | -0.006095 |
| 49               | 1                | 0              | 1.399629                | -3.269405 | 0.002199  |
| 50               | 1                | 0              | 1.631834                | 3.386920  | -0.032017 |
| 51               | 1                | 0              | 3.328684                | 5.202009  | -0.020601 |
| 52               | 1                | 0              | 5.738157                | 4.685280  | -0.019557 |

|    |   |   |            |           |           |
|----|---|---|------------|-----------|-----------|
| 53 | 1 | 0 | 6.520062   | 2.321721  | -0.017814 |
| 54 | 1 | 0 | -6.519731  | 2.322259  | 0.020990  |
| 55 | 1 | 0 | -5.737606  | 4.685697  | 0.024321  |
| 56 | 1 | 0 | -3.328080  | 5.202215  | 0.022526  |
| 57 | 1 | 0 | -1.631388  | 3.386940  | 0.029758  |
| 58 | 1 | 0 | -8.624323  | -1.329042 | -1.971379 |
| 59 | 1 | 0 | -7.947776  | -2.449147 | 2.101312  |
| 60 | 1 | 0 | -4.665854  | -1.904524 | 2.392758  |
| 61 | 1 | 0 | -6.144879  | -1.657741 | 3.310279  |
| 62 | 1 | 0 | -5.228203  | -0.272772 | 2.724209  |
| 63 | 1 | 0 | -7.022261  | -0.234715 | -3.230742 |
| 64 | 1 | 0 | -5.344407  | -0.224690 | -2.694121 |
| 65 | 1 | 0 | -6.390610  | 1.139646  | -2.333627 |
| 66 | 1 | 0 | -9.627941  | -3.730434 | -0.341948 |
| 67 | 1 | 0 | -10.505339 | -2.216144 | -0.527257 |
| 68 | 1 | 0 | -10.142145 | -2.837672 | 1.086852  |
| 69 | 1 | 0 | 8.609789   | -1.348510 | 1.983911  |
| 70 | 1 | 0 | 7.942873   | -2.467421 | -2.090501 |
| 71 | 1 | 0 | 4.669885   | -1.913126 | -2.393226 |
| 72 | 1 | 0 | 6.149510   | -1.661461 | -3.308552 |
| 73 | 1 | 0 | 5.227924   | -0.279561 | -2.723151 |
| 74 | 1 | 0 | 6.376608   | 1.132093  | 2.337809  |
| 75 | 1 | 0 | 7.013408   | -0.239987 | 3.234711  |
| 76 | 1 | 0 | 5.336069   | -0.237093 | 2.696179  |
| 77 | 1 | 0 | 9.995794   | -3.150067 | 0.887150  |
| 78 | 1 | 0 | 9.795819   | -3.478412 | -0.838133 |
| 79 | 1 | 0 | 10.574139  | -1.991186 | -0.304414 |

No imaginary frequency.

Total energy = -1772.56449603 hartree.

**Table S11.** Cartesian Coordinates of  $\text{DFFu}^{2-}$  at the B3LYP/6-311G(d) level

| Center Number | Atomic Number | Atomic Type | Coordinates (Angstroms) |           |           |
|---------------|---------------|-------------|-------------------------|-----------|-----------|
|               |               |             | X                       | Y         | Z         |
| 1             | 6             | 0           | -0.726160               | -1.264510 | 0.009452  |
| 2             | 6             | 0           | -1.109035               | 0.085114  | 0.014247  |
| 3             | 8             | 0           | -0.000201               | 0.914614  | -0.000122 |
| 4             | 6             | 0           | 1.107946                | 0.084179  | -0.013149 |
| 5             | 6             | 0           | 0.723930                | -1.265117 | -0.006091 |
| 6             | 6             | 0           | -1.728788               | -2.258200 | 0.002154  |
| 7             | 6             | 0           | -3.067425               | -1.896818 | 0.011940  |
| 8             | 6             | 0           | -3.453429               | -0.531129 | 0.040107  |
| 9             | 6             | 0           | -2.439541               | 0.499700  | 0.025632  |
| 10            | 6             | 0           | 2.438791                | 0.497655  | -0.025419 |
| 11            | 6             | 0           | 3.451891                | -0.534015 | -0.039144 |
| 12            | 6             | 0           | 3.064674                | -1.899334 | -0.007947 |
| 13            | 6             | 0           | 1.725740                | -2.259585 | 0.002989  |
| 14            | 6             | 0           | 3.108987                | 1.767174  | -0.006220 |
| 15            | 6             | 0           | 4.532137                | 1.495667  | 0.005701  |
| 16            | 6             | 0           | 4.745810                | 0.084575  | -0.019190 |
| 17            | 6             | 0           | -4.746878               | 0.088422  | 0.018568  |
| 18            | 6             | 0           | -4.532144               | 1.499311  | -0.006741 |
| 19            | 6             | 0           | -3.108748               | 1.769714  | 0.004955  |
| 20            | 6             | 0           | 2.637045                | 3.083493  | -0.014809 |
| 21            | 6             | 0           | 3.538625                | 4.144663  | -0.018040 |
| 22            | 6             | 0           | 4.925602                | 3.891319  | -0.028058 |
| 23            | 6             | 0           | 5.421739                | 2.594889  | -0.023947 |
| 24            | 6             | 0           | -5.420785               | 2.599346  | 0.023045  |
| 25            | 6             | 0           | -4.923547               | 3.895364  | 0.026422  |
| 26            | 6             | 0           | -3.536383               | 4.147568  | 0.015522  |
| 27            | 6             | 0           | -2.635702               | 3.085627  | 0.012563  |
| 28            | 6             | 0           | -6.048460               | -0.596073 | 0.034703  |
| 29            | 6             | 0           | -6.974223               | -0.445080 | -1.033690 |
| 30            | 6             | 0           | -8.212757               | -1.089605 | -0.989818 |
| 31            | 6             | 0           | -8.586591               | -1.911985 | 0.073161  |

|    |   |   |            |           |           |
|----|---|---|------------|-----------|-----------|
| 32 | 6 | 0 | -7.674880  | -2.063932 | 1.119097  |
| 33 | 6 | 0 | -6.433368  | -1.425276 | 1.124456  |
| 34 | 6 | 0 | -5.539501  | -1.567911 | 2.332350  |
| 35 | 6 | 0 | -6.609969  | 0.362486  | -2.255868 |
| 36 | 6 | 0 | -9.911958  | -2.637803 | 0.077308  |
| 37 | 6 | 0 | 6.047682   | -0.599391 | -0.035281 |
| 38 | 6 | 0 | 6.970520   | -0.452119 | 1.036431  |
| 39 | 6 | 0 | 8.207426   | -1.099826 | 0.995843  |
| 40 | 6 | 0 | 8.583564   | -1.919959 | -0.068130 |
| 41 | 6 | 0 | 7.671896   | -2.073823 | -1.113790 |
| 42 | 6 | 0 | 6.432088   | -1.431753 | -1.122555 |
| 43 | 6 | 0 | 5.536844   | -1.581095 | -2.328665 |
| 44 | 6 | 0 | 6.600531   | 0.347723  | 2.261911  |
| 45 | 6 | 0 | 9.938414   | -2.588107 | -0.103908 |
| 46 | 1 | 0 | -1.450190  | -3.309849 | -0.021083 |
| 47 | 1 | 0 | -3.832031  | -2.669107 | -0.028827 |
| 48 | 1 | 0 | 3.828515   | -2.672245 | 0.034845  |
| 49 | 1 | 0 | 1.446315   | -3.310956 | 0.028705  |
| 50 | 1 | 0 | 1.566720   | 3.269777  | -0.024768 |
| 51 | 1 | 0 | 3.173740   | 5.169392  | -0.022118 |
| 52 | 1 | 0 | 5.621691   | 4.729368  | -0.047890 |
| 53 | 1 | 0 | 6.496084   | 2.426734  | -0.066026 |
| 54 | 1 | 0 | -6.495230  | 2.432201  | 0.066250  |
| 55 | 1 | 0 | -5.618947  | 4.733978  | 0.046477  |
| 56 | 1 | 0 | -3.170647  | 5.171995  | 0.018969  |
| 57 | 1 | 0 | -1.565214  | 3.270994  | 0.022196  |
| 58 | 1 | 0 | -8.897937  | -0.962540 | -1.828062 |
| 59 | 1 | 0 | -7.949624  | -2.680671 | 1.974976  |
| 60 | 1 | 0 | -4.660788  | -2.187693 | 2.130952  |
| 61 | 1 | 0 | -6.083716  | -2.012287 | 3.172599  |
| 62 | 1 | 0 | -5.149631  | -0.593029 | 2.636727  |
| 63 | 1 | 0 | -7.301334  | 0.158491  | -3.080683 |
| 64 | 1 | 0 | -5.592073  | 0.129146  | -2.578608 |
| 65 | 1 | 0 | -6.619712  | 1.439587  | -2.063517 |
| 66 | 1 | 0 | -9.837829  | -3.637309 | -0.372516 |
| 67 | 1 | 0 | -10.673678 | -2.090153 | -0.487420 |
| 68 | 1 | 0 | -10.292308 | -2.775990 | 1.095159  |
| 69 | 1 | 0 | 8.888608   | -0.979883 | 1.838424  |
| 70 | 1 | 0 | 7.943524   | -2.696962 | -1.965908 |
| 71 | 1 | 0 | 4.659430   | -2.201750 | -2.124490 |
| 72 | 1 | 0 | 6.081109   | -2.027047 | -3.168046 |
| 73 | 1 | 0 | 5.144873   | -0.607978 | -2.635938 |
| 74 | 1 | 0 | 6.609658   | 1.425825  | 2.075139  |
| 75 | 1 | 0 | 7.289470   | 0.140419  | 3.087934  |
| 76 | 1 | 0 | 5.581818   | 0.111453  | 2.579921  |
| 77 | 1 | 0 | 10.330638  | -2.754364 | 0.904876  |
| 78 | 1 | 0 | 9.897053   | -3.560887 | -0.605409 |
| 79 | 1 | 0 | 10.683590  | -1.984843 | -0.640450 |

No imaginary frequency.

Total energy = -1772.84312680 hartree.

**Table S12.** Cartesian Coordinates of **1'** (Closed-Shell Singlet) at the B3LYP/6-311G(d) level

| Center Number | Atomic Number | Atomic Type | Coordinates (Angstroms) |           |          |
|---------------|---------------|-------------|-------------------------|-----------|----------|
|               |               |             | X                       | Y         | Z        |
| 1             | 6             | 0           | -3.725823               | -0.217100 | 0.000046 |
| 2             | 6             | 0           | -3.520461               | 1.236315  | 0.000039 |
| 3             | 6             | 0           | -2.206119               | 1.752090  | 0.000088 |
| 4             | 6             | 0           | -1.114743               | 0.896717  | 0.000090 |
| 5             | 6             | 0           | -1.320508               | -0.549830 | 0.000074 |
| 6             | 6             | 0           | -2.666216               | -1.065093 | 0.000064 |
| 7             | 6             | 0           | 0.225517                | 1.382573  | 0.000080 |
| 8             | 6             | 0           | 1.320508                | 0.549835  | 0.000072 |
| 9             | 6             | 0           | 1.114742                | -0.896711 | 0.000085 |
| 10            | 6             | 0           | -0.225517               | -1.382568 | 0.000078 |



|    |   |   |           |           |           |
|----|---|---|-----------|-----------|-----------|
| 11 | 6 | 0 | 2.666217  | 1.065096  | 0.000067  |
| 12 | 6 | 0 | 3.725823  | 0.217102  | 0.000038  |
| 13 | 6 | 0 | 3.520460  | -1.236313 | 0.000027  |
| 14 | 6 | 0 | 2.206117  | -1.752086 | 0.000077  |
| 15 | 6 | 0 | 5.169739  | 0.435734  | 0.000016  |
| 16 | 6 | 0 | 5.788835  | -0.851506 | -0.000044 |
| 17 | 6 | 0 | 4.758125  | -1.859429 | -0.000098 |
| 18 | 6 | 0 | -5.169738 | -0.435735 | 0.000026  |
| 19 | 6 | 0 | -5.788837 | 0.851504  | -0.000038 |
| 20 | 6 | 0 | -4.758128 | 1.859429  | -0.000116 |
| 21 | 6 | 0 | 5.944442  | 1.589119  | 0.000009  |
| 22 | 6 | 0 | 7.335972  | 1.470256  | -0.000065 |
| 23 | 6 | 0 | 7.946755  | 0.209621  | -0.000132 |
| 24 | 6 | 0 | 7.184403  | -0.955320 | -0.000119 |
| 25 | 6 | 0 | -5.944438 | -1.589121 | 0.000013  |
| 26 | 6 | 0 | -7.335969 | -1.470261 | -0.000069 |
| 27 | 6 | 0 | -7.946755 | -0.209627 | -0.000138 |
| 28 | 6 | 0 | -7.184404 | 0.955315  | -0.000121 |
| 29 | 1 | 0 | -2.044976 | 2.826880  | 0.000119  |
| 30 | 1 | 0 | -2.803910 | -2.143307 | 0.000143  |
| 31 | 1 | 0 | 0.378319  | 2.459088  | 0.000114  |
| 32 | 1 | 0 | -0.378320 | -2.459083 | 0.000109  |
| 33 | 1 | 0 | 2.803913  | 2.143309  | 0.000136  |
| 34 | 1 | 0 | 2.044972  | -2.826876 | 0.000109  |
| 35 | 1 | 0 | 4.931868  | -2.928658 | -0.000138 |
| 36 | 1 | 0 | -4.931873 | 2.928657  | -0.000159 |
| 37 | 1 | 0 | 5.483493  | 2.572508  | 0.000081  |
| 38 | 1 | 0 | 7.951684  | 2.363798  | -0.000079 |
| 39 | 1 | 0 | 9.030101  | 0.142238  | -0.000199 |
| 40 | 1 | 0 | 7.667241  | -1.927865 | -0.000169 |
| 41 | 1 | 0 | -5.483488 | -2.572510 | 0.000098  |
| 42 | 1 | 0 | -7.951678 | -2.363804 | -0.000090 |
| 43 | 1 | 0 | -9.030100 | -0.142247 | -0.000213 |
| 44 | 1 | 0 | -7.667244 | 1.927860  | -0.000167 |

-----  
No imaginary frequency.

Total energy = -1076.82786896 hartree.

**Table S13.** Cartesian Coordinates of  $1'$  (Open-Shell Triplet) at the UB3LYP/6-311G(d) level

| Center<br>Number | Atomic<br>Number | Atomic<br>Type | Coordinates (Angstroms) |           |           |
|------------------|------------------|----------------|-------------------------|-----------|-----------|
|                  |                  |                | X                       | Y         | Z         |
| 1                | 6                | 0              | -3.719497               | -0.193425 | -0.000015 |
| 2                | 6                | 0              | -3.513306               | 1.249180  | -0.000011 |
| 3                | 6                | 0              | -2.235597               | 1.769026  | -0.000008 |
| 4                | 6                | 0              | -1.106888               | 0.894588  | -0.000011 |
| 5                | 6                | 0              | -1.318520               | -0.534609 | -0.000013 |
| 6                | 6                | 0              | -2.656934               | -1.047102 | -0.000015 |
| 7                | 6                | 0              | 0.206486                | 1.381636  | -0.000012 |
| 8                | 6                | 0              | 1.318520                | 0.534609  | -0.000012 |
| 9                | 6                | 0              | 1.106888                | -0.894588 | -0.000011 |
| 10               | 6                | 0              | -0.206486               | -1.381637 | -0.000013 |
| 11               | 6                | 0              | 2.656934                | 1.047102  | -0.000012 |
| 12               | 6                | 0              | 3.719497                | 0.193424  | -0.000012 |
| 13               | 6                | 0              | 3.513306                | -1.249180 | -0.000009 |
| 14               | 6                | 0              | 2.235597                | -1.769026 | -0.000008 |
| 15               | 6                | 0              | 5.164867                | 0.416809  | -0.000005 |
| 16               | 6                | 0              | 5.799255                | -0.868894 | -0.000006 |
| 17               | 6                | 0              | 4.794705                | -1.880251 | -0.000022 |
| 18               | 6                | 0              | -5.164867               | -0.416809 | -0.000007 |
| 19               | 6                | 0              | -5.799254               | 0.868894  | -0.000008 |
| 20               | 6                | 0              | -4.794705               | 1.880250  | -0.000029 |
| 21               | 6                | 0              | 5.928957                | 1.575238  | 0.000004  |
| 22               | 6                | 0              | 7.323319                | 1.470111  | 0.000010  |
| 23               | 6                | 0              | 7.949849                | 0.215123  | 0.000010  |
| 24               | 6                | 0              | 7.201623                | -0.955887 | 0.000002  |

|    |   |   |           |           |           |
|----|---|---|-----------|-----------|-----------|
| 25 | 6 | 0 | -5.928957 | -1.575238 | 0.000003  |
| 26 | 6 | 0 | -7.323319 | -1.470111 | 0.000011  |
| 27 | 6 | 0 | -7.949849 | -0.215123 | 0.000010  |
| 28 | 6 | 0 | -7.201623 | 0.955886  | 0.000002  |
| 29 | 1 | 0 | -2.069976 | 2.842711  | -0.000012 |
| 30 | 1 | 0 | -2.798885 | -2.124516 | -0.000011 |
| 31 | 1 | 0 | 0.365816  | 2.456913  | -0.000012 |
| 32 | 1 | 0 | -0.365816 | -2.456913 | -0.000013 |
| 33 | 1 | 0 | 2.798885  | 2.124516  | -0.000009 |
| 34 | 1 | 0 | 2.069976  | -2.842711 | -0.000012 |
| 35 | 1 | 0 | 4.972300  | -2.948290 | -0.000028 |
| 36 | 1 | 0 | -4.972300 | 2.948290  | -0.000036 |
| 37 | 1 | 0 | 5.459334  | 2.554345  | 0.000006  |
| 38 | 1 | 0 | 7.929134  | 2.370357  | 0.000016  |
| 39 | 1 | 0 | 9.033817  | 0.160840  | 0.000013  |
| 40 | 1 | 0 | 7.693739  | -1.923657 | -0.000001 |
| 41 | 1 | 0 | -5.459334 | -2.554345 | 0.000005  |
| 42 | 1 | 0 | -7.929134 | -2.370357 | 0.000017  |
| 43 | 1 | 0 | -9.033817 | -0.160840 | 0.000014  |
| 44 | 1 | 0 | -7.693739 | 1.923657  | -0.000003 |

No imaginary frequency.

Total energy = -1076.82153125 hartree.

**Table S14.** Cartesian Coordinates of **1'** (Open-Shell Singlet) at the UB3LYP/6-311G(d) level

| Center Number | Atomic Number | Atomic Type | Coordinates (Angstroms) |           |           |
|---------------|---------------|-------------|-------------------------|-----------|-----------|
|               |               |             | X                       | Y         | Z         |
| 1             | 6             | 0           | -3.722731               | -0.205707 | 0.000007  |
| 2             | 6             | 0           | -3.517018               | 1.242401  | 0.000004  |
| 3             | 6             | 0           | -2.218527               | 1.759839  | -0.000000 |
| 4             | 6             | 0           | -1.110999               | 0.896090  | 0.000002  |
| 5             | 6             | 0           | -1.319670               | -0.542210 | 0.000006  |
| 6             | 6             | 0           | -2.661331               | -1.056234 | 0.000007  |
| 7             | 6             | 0           | 0.216835                | 1.381950  | 0.000003  |
| 8             | 6             | 0           | 1.319670                | 0.542210  | 0.000004  |
| 9             | 6             | 0           | 1.110999                | -0.896090 | 0.000003  |
| 10            | 6             | 0           | -0.216836               | -1.381950 | 0.000005  |
| 11            | 6             | 0           | 2.661331                | 1.056234  | 0.000003  |
| 12            | 6             | 0           | 3.722731                | 0.205707  | 0.000004  |
| 13            | 6             | 0           | 3.517018                | -1.242401 | 0.000004  |
| 14            | 6             | 0           | 2.218527                | -1.759839 | 0.000002  |
| 15            | 6             | 0           | 5.167391                | 0.427023  | -0.000006 |
| 16            | 6             | 0           | 5.793243                | -0.858689 | -0.000005 |
| 17            | 6             | 0           | 4.772524                | -1.868832 | 0.000018  |
| 18            | 6             | 0           | -5.167391               | -0.427023 | -0.000005 |
| 19            | 6             | 0           | -5.793243               | 0.858689  | -0.000006 |
| 20            | 6             | 0           | -4.772524               | 1.868832  | 0.000021  |
| 21            | 6             | 0           | 5.937186                | 1.583104  | -0.000019 |
| 22            | 6             | 0           | 7.329729                | 1.470644  | -0.000028 |
| 23            | 6             | 0           | 7.947442                | 0.212718  | -0.000026 |
| 24            | 6             | 0           | 7.191156                | -0.955100 | -0.000015 |
| 25            | 6             | 0           | -5.937186               | -1.583104 | -0.000019 |
| 26            | 6             | 0           | -7.329729               | -1.470644 | -0.000031 |
| 27            | 6             | 0           | -7.947442               | -0.212718 | -0.000030 |
| 28            | 6             | 0           | -7.191155               | 0.955100  | -0.000019 |
| 29            | 1             | 0           | -2.055136               | 2.834136  | 0.000005  |
| 30            | 1             | 0           | -2.800969               | -2.134105 | 0.000002  |
| 31            | 1             | 0           | 0.373177                | 2.457846  | 0.000001  |
| 32            | 1             | 0           | -0.373177               | -2.457846 | 0.000006  |
| 33            | 1             | 0           | 2.800969                | 2.134105  | -0.000002 |
| 34            | 1             | 0           | 2.055136                | -2.834136 | 0.000008  |
| 35            | 1             | 0           | 4.946999                | -2.937755 | 0.000027  |
| 36            | 1             | 0           | -4.946999               | 2.937754  | 0.000031  |
| 37            | 1             | 0           | 5.471930                | 2.564403  | -0.000022 |
| 38            | 1             | 0           | 7.941110                | 2.367149  | -0.000037 |

|    |   |   |           |           |           |
|----|---|---|-----------|-----------|-----------|
| 39 | 1 | 0 | 9.031089  | 0.151307  | -0.000031 |
| 40 | 1 | 0 | 7.677948  | -1.925640 | -0.000010 |
| 41 | 1 | 0 | -5.471929 | -2.564403 | -0.000021 |
| 42 | 1 | 0 | -7.941110 | -2.367149 | -0.000040 |
| 43 | 1 | 0 | -9.031089 | -0.151307 | -0.000037 |
| 44 | 1 | 0 | -7.677947 | 1.925640  | -0.000015 |

-----  
No imaginary frequency.

Total energy = -1076.83045019 hartree.

**Table S15.** Cartesian Coordinates of **2** (Closed-Shell Singlet) at the B3LYP/6-311G(d) level

| Center<br>Number | Atomic<br>Number | Atomic<br>Type | Coordinates (Angstroms) |           |           |
|------------------|------------------|----------------|-------------------------|-----------|-----------|
|                  |                  |                | X                       | Y         | Z         |
| 1                | 6                | 0              | -1.434803               | 1.681085  | -0.000007 |
| 2                | 6                | 0              | -2.867409               | 1.689401  | 0.000002  |
| 3                | 6                | 0              | -3.575640               | 0.425343  | 0.000031  |
| 4                | 6                | 0              | -2.809647               | -0.813847 | -0.000076 |
| 5                | 6                | 0              | -1.455806               | -0.803937 | -0.000086 |
| 6                | 6                | 0              | -0.703465               | 0.429401  | -0.000023 |
| 7                | 6                | 0              | -0.730821               | 2.916622  | -0.000017 |
| 8                | 6                | 0              | -1.467921               | 4.114594  | -0.000066 |
| 9                | 6                | 0              | -2.852065               | 4.110063  | -0.000078 |
| 10               | 6                | 0              | -3.547757               | 2.906648  | -0.000038 |
| 11               | 6                | 0              | 0.703464                | 0.429402  | -0.000002 |
| 12               | 6                | 0              | 1.434802                | 1.681085  | -0.000000 |
| 13               | 6                | 0              | 0.730820                | 2.916622  | 0.000015  |
| 14               | 6                | 0              | 2.867409                | 1.689402  | -0.000002 |
| 15               | 6                | 0              | 3.547757                | 2.906649  | 0.000027  |
| 16               | 6                | 0              | 2.852064                | 4.110064  | 0.000068  |
| 17               | 6                | 0              | 1.467920                | 4.114594  | 0.000064  |
| 18               | 6                | 0              | 1.455806                | -0.803937 | 0.000028  |
| 19               | 6                | 0              | 2.809647                | -0.813846 | 0.000019  |
| 20               | 6                | 0              | 3.575640                | 0.425344  | -0.000025 |
| 21               | 6                | 0              | 3.771575                | -1.918858 | 0.000030  |
| 22               | 6                | 0              | 5.066254                | -1.331484 | -0.000032 |
| 23               | 6                | 0              | 4.911653                | 0.115433  | -0.000080 |
| 24               | 6                | 0              | -4.911653               | 0.115432  | 0.000146  |
| 25               | 6                | 0              | -5.066253               | -1.331485 | 0.000096  |
| 26               | 6                | 0              | -3.771574               | -1.918859 | -0.000048 |
| 27               | 6                | 0              | 3.621522                | -3.297875 | 0.000088  |
| 28               | 6                | 0              | 4.766578                | -4.102438 | 0.000079  |
| 29               | 6                | 0              | 6.039273                | -3.527792 | 0.000015  |
| 30               | 6                | 0              | 6.200846                | -2.139716 | -0.000041 |
| 31               | 6                | 0              | -6.200845               | -2.139717 | 0.000146  |
| 32               | 6                | 0              | -6.039272               | -3.527792 | 0.000039  |
| 33               | 6                | 0              | -4.766578               | -4.102439 | -0.000117 |
| 34               | 6                | 0              | -3.621521               | -3.297875 | -0.000162 |
| 35               | 1                | 0              | -0.931097               | -1.749627 | -0.000146 |
| 36               | 1                | 0              | -0.959665               | 5.069221  | -0.000113 |
| 37               | 1                | 0              | -3.394180               | 5.050145  | -0.000126 |
| 38               | 1                | 0              | -4.632272               | 2.912383  | -0.000058 |
| 39               | 1                | 0              | 4.632271                | 2.912384  | 0.000029  |
| 40               | 1                | 0              | 3.394179                | 5.050146  | 0.000108  |
| 41               | 1                | 0              | 0.959663                | 5.069222  | 0.000115  |
| 42               | 1                | 0              | 0.931097                | -1.749627 | 0.000089  |
| 43               | 1                | 0              | 5.739454                | 0.813673  | -0.000136 |
| 44               | 1                | 0              | -5.739454               | 0.813671  | 0.000272  |
| 45               | 1                | 0              | 2.636706                | -3.756053 | 0.000140  |
| 46               | 1                | 0              | 4.664450                | -5.182683 | 0.000122  |
| 47               | 1                | 0              | 6.915106                | -4.168971 | 0.000007  |
| 48               | 1                | 0              | 7.195446                | -1.703952 | -0.000094 |
| 49               | 1                | 0              | -7.195444               | -1.703951 | 0.000265  |
| 50               | 1                | 0              | -6.915105               | -4.168971 | 0.000073  |
| 51               | 1                | 0              | -4.664449               | -5.182683 | -0.000207 |
| 52               | 1                | 0              | -2.636706               | -3.756054 | -0.000291 |

-----  
 No imaginary frequency.  
 Total energy = -1306.76002693 hartree.

**Table S16.** Cartesian Coordinates of **2'** (Open-Shell Triplet) at the UB3LYP/6-311G(d) level

| Center<br>Number | Atomic<br>Number | Atomic<br>Type | Coordinates (Angstroms) |           |           |
|------------------|------------------|----------------|-------------------------|-----------|-----------|
|                  |                  |                | X                       | Y         | Z         |
| 1                | 6                | 0              | -1.444382               | 1.648872  | 0.043529  |
| 2                | 6                | 0              | -2.881027               | 1.663099  | 0.089041  |
| 3                | 6                | 0              | -3.578250               | 0.417781  | 0.054594  |
| 4                | 6                | 0              | -2.851227               | -0.797161 | -0.026296 |
| 5                | 6                | 0              | -1.463710               | -0.795956 | -0.052864 |
| 6                | 6                | 0              | -0.735271               | 0.399629  | -0.003857 |
| 7                | 6                | 0              | -0.735984               | 2.890133  | 0.045543  |
| 8                | 6                | 0              | -1.463303               | 4.074093  | 0.129923  |
| 9                | 6                | 0              | -2.861564               | 4.078898  | 0.190700  |
| 10               | 6                | 0              | -3.562477               | 2.894756  | 0.163420  |
| 11               | 6                | 0              | 0.735271                | 0.399629  | 0.003859  |
| 12               | 6                | 0              | 1.444382                | 1.648872  | -0.043524 |
| 13               | 6                | 0              | 0.735984                | 2.890133  | -0.045537 |
| 14               | 6                | 0              | 2.881026                | 1.663099  | -0.089037 |
| 15               | 6                | 0              | 3.562477                | 2.894757  | -0.163414 |
| 16               | 6                | 0              | 2.861564                | 4.078899  | -0.190692 |
| 17               | 6                | 0              | 1.463302                | 4.074094  | -0.129915 |
| 18               | 6                | 0              | 1.463710                | -0.795956 | 0.052864  |
| 19               | 6                | 0              | 2.851227                | -0.797161 | 0.026297  |
| 20               | 6                | 0              | 3.578250                | 0.417782  | -0.054591 |
| 21               | 6                | 0              | 3.819177                | -1.896738 | 0.061736  |
| 22               | 6                | 0              | 5.120488                | -1.308044 | -0.003549 |
| 23               | 6                | 0              | 4.965485                | 0.115065  | -0.075069 |
| 24               | 6                | 0              | -4.965485               | 0.115064  | 0.075071  |
| 25               | 6                | 0              | -5.120487               | -1.308045 | 0.003548  |
| 26               | 6                | 0              | -3.819177               | -1.896738 | -0.061737 |
| 27               | 6                | 0              | 3.677328                | -3.272069 | 0.140981  |
| 28               | 6                | 0              | 4.827787                | -4.074297 | 0.155838  |
| 29               | 6                | 0              | 6.102127                | -3.503464 | 0.091553  |
| 30               | 6                | 0              | 6.259600                | -2.119722 | 0.011393  |
| 31               | 6                | 0              | -6.259599               | -2.119723 | -0.011395 |
| 32               | 6                | 0              | -6.102126               | -3.503465 | -0.091557 |
| 33               | 6                | 0              | -4.827786               | -4.074297 | -0.155843 |
| 34               | 6                | 0              | -3.677328               | -3.272069 | -0.140985 |
| 35               | 1                | 0              | -0.947981               | -1.745386 | -0.118571 |
| 36               | 1                | 0              | -0.953832               | 5.028345  | 0.155282  |
| 37               | 1                | 0              | -3.389405               | 5.024895  | 0.256070  |
| 38               | 1                | 0              | -4.646133               | 2.902798  | 0.201882  |
| 39               | 1                | 0              | 4.646133                | 2.902799  | -0.201876 |
| 40               | 1                | 0              | 3.389405                | 5.024896  | -0.256061 |
| 41               | 1                | 0              | 0.953831                | 5.028345  | -0.155273 |
| 42               | 1                | 0              | 0.947981                | -1.745386 | 0.118570  |
| 43               | 1                | 0              | 5.780000                | 0.825513  | -0.131415 |
| 44               | 1                | 0              | -5.780000               | 0.825512  | 0.131418  |
| 45               | 1                | 0              | 2.695894                | -3.734291 | 0.192215  |
| 46               | 1                | 0              | 4.726408                | -5.152918 | 0.218066  |
| 47               | 1                | 0              | 6.977313                | -4.144893 | 0.104471  |
| 48               | 1                | 0              | 7.252225                | -1.682157 | -0.037795 |
| 49               | 1                | 0              | -7.252224               | -1.682158 | 0.037794  |
| 50               | 1                | 0              | -6.977313               | -4.144894 | -0.104476 |
| 51               | 1                | 0              | -4.726407               | -5.152918 | -0.218073 |
| 52               | 1                | 0              | -2.695894               | -3.734291 | -0.192220 |

-----  
 No imaginary frequency.  
 Total energy = -1306.73410138 hartree.

**Table S17.** Cartesian Coordinates of **2'** (Open-Shell Singlet) at the UB3LYP/6-311G(d) level

| Center<br>Number | Atomic<br>Number | Atomic<br>Type | Coordinates (Angstroms) |           |           |
|------------------|------------------|----------------|-------------------------|-----------|-----------|
|                  |                  |                | X                       | Y         | Z         |
| 1                | 6                | 0              | -1.434783               | 1.681149  | 0.002351  |
| 2                | 6                | 0              | -2.867402               | 1.689449  | 0.004794  |
| 3                | 6                | 0              | -3.575628               | 0.425353  | 0.005773  |
| 4                | 6                | 0              | -2.809598               | -0.813828 | 0.004085  |
| 5                | 6                | 0              | -1.455766               | -0.803868 | 0.001810  |
| 6                | 6                | 0              | -0.703455               | 0.429461  | 0.001025  |
| 7                | 6                | 0              | -0.730815               | 2.916674  | 0.001247  |
| 8                | 6                | 0              | -1.467950               | 4.114660  | 0.002524  |
| 9                | 6                | 0              | -2.852065               | 4.110116  | 0.004899  |
| 10               | 6                | 0              | -3.547755               | 2.906662  | 0.006030  |
| 11               | 6                | 0              | 0.703455                | 0.429461  | -0.001023 |
| 12               | 6                | 0              | 1.434783                | 1.681149  | -0.002346 |
| 13               | 6                | 0              | 0.730815                | 2.916675  | -0.001241 |
| 14               | 6                | 0              | 2.867402                | 1.689449  | -0.004790 |
| 15               | 6                | 0              | 3.547754                | 2.906662  | -0.006024 |
| 16               | 6                | 0              | 2.852064                | 4.110116  | -0.004891 |
| 17               | 6                | 0              | 1.467950                | 4.114660  | -0.002517 |
| 18               | 6                | 0              | 1.455767                | -0.803868 | -0.001809 |
| 19               | 6                | 0              | 2.809599                | -0.813828 | -0.004084 |
| 20               | 6                | 0              | 3.575628                | 0.425354  | -0.005771 |
| 21               | 6                | 0              | 3.771492                | -1.918860 | -0.005342 |
| 22               | 6                | 0              | 5.066153                | -1.331545 | -0.007736 |
| 23               | 6                | 0              | 4.911599                | 0.115417  | -0.007777 |
| 24               | 6                | 0              | -4.911599               | 0.115417  | 0.007779  |
| 25               | 6                | 0              | -5.066153               | -1.331546 | 0.007735  |
| 26               | 6                | 0              | -3.771491               | -1.918860 | 0.005340  |
| 27               | 6                | 0              | 3.621388                | -3.297900 | -0.004726 |
| 28               | 6                | 0              | 4.766405                | -4.102477 | -0.006439 |
| 29               | 6                | 0              | 6.039133                | -3.527854 | -0.008779 |
| 30               | 6                | 0              | 6.200747                | -2.139802 | -0.009467 |
| 31               | 6                | 0              | -6.200746               | -2.139803 | 0.009465  |
| 32               | 6                | 0              | -6.039132               | -3.527855 | 0.008775  |
| 33               | 6                | 0              | -4.766404               | -4.102477 | 0.006434  |
| 34               | 6                | 0              | -3.621387               | -3.297900 | 0.004722  |
| 35               | 1                | 0              | -0.931102               | -1.749582 | 0.000410  |
| 36               | 1                | 0              | -0.959709               | 5.069292  | 0.001628  |
| 37               | 1                | 0              | -3.394212               | 5.050177  | 0.005841  |
| 38               | 1                | 0              | -4.632265               | 2.912409  | 0.007862  |
| 39               | 1                | 0              | 4.632265                | 2.912410  | -0.007856 |
| 40               | 1                | 0              | 3.394212                | 5.050177  | -0.005831 |
| 41               | 1                | 0              | 0.959709                | 5.069293  | -0.001619 |
| 42               | 1                | 0              | 0.931103                | -1.749582 | -0.000411 |
| 43               | 1                | 0              | 5.739479                | 0.813552  | -0.009248 |
| 44               | 1                | 0              | -5.739479               | 0.813552  | 0.009251  |
| 45               | 1                | 0              | 2.636545                | -3.756010 | -0.002931 |
| 46               | 1                | 0              | 4.664297                | -5.182723 | -0.005954 |
| 47               | 1                | 0              | 6.914924                | -4.169091 | -0.010079 |
| 48               | 1                | 0              | 7.195348                | -1.704049 | -0.011272 |
| 49               | 1                | 0              | -7.195347               | -1.704049 | 0.011271  |
| 50               | 1                | 0              | -6.914923               | -4.169092 | 0.010074  |
| 51               | 1                | 0              | -4.664297               | -5.182724 | 0.005947  |
| 52               | 1                | 0              | -2.636544               | -3.756010 | 0.002927  |

No imaginary frequency.

Total energy = -1306.76002690 hartree.

**Table S18.** Cartesian Coordinates of **3'** (Closed-Shell Singlet) at the B3LYP/6-311G(d) level

| Center<br>Number | Atomic<br>Number | Atomic<br>Type | Coordinates (Angstroms) |          |           |
|------------------|------------------|----------------|-------------------------|----------|-----------|
|                  |                  |                | X                       | Y        | Z         |
| 1                | 6                | 0              | -0.704956               | 1.526497 | -0.001518 |

|    |   |   |           |           |           |
|----|---|---|-----------|-----------|-----------|
| 2  | 6 | 0 | -1.439856 | 0.263838  | -0.005724 |
| 3  | 6 | 0 | 1.439852  | 0.263836  | -0.005726 |
| 4  | 6 | 0 | 0.704952  | 1.526496  | -0.001522 |
| 5  | 6 | 0 | -1.466325 | 2.753227  | 0.002808  |
| 6  | 6 | 0 | -2.823728 | 2.767392  | 0.003363  |
| 7  | 6 | 0 | -3.547413 | 1.540145  | 0.001596  |
| 8  | 6 | 0 | -2.827021 | 0.277669  | -0.000902 |
| 9  | 6 | 0 | 2.827018  | 0.277666  | -0.000910 |
| 10 | 6 | 0 | 3.547408  | 1.540143  | 0.001597  |
| 11 | 6 | 0 | 2.823724  | 2.767391  | 0.003358  |
| 12 | 6 | 0 | 1.466320  | 2.753226  | 0.002797  |
| 13 | 6 | 0 | 3.855696  | -0.785086 | 0.000375  |
| 14 | 6 | 0 | 5.125452  | -0.126183 | 0.000118  |
| 15 | 6 | 0 | 4.904373  | 1.300252  | 0.000950  |
| 16 | 6 | 0 | -4.904377 | 1.300251  | 0.000936  |
| 17 | 6 | 0 | -5.125453 | -0.126185 | 0.000096  |
| 18 | 6 | 0 | -3.855696 | -0.785085 | 0.000386  |
| 19 | 6 | 0 | 3.825538  | -2.175739 | 0.004998  |
| 20 | 6 | 0 | 5.026361  | -2.899396 | 0.006070  |
| 21 | 6 | 0 | 6.257371  | -2.247695 | 0.003558  |
| 22 | 6 | 0 | 6.313512  | -0.852295 | 0.001123  |
| 23 | 6 | 0 | -6.313509 | -0.852304 | 0.001093  |
| 24 | 6 | 0 | -6.257361 | -2.247704 | 0.003554  |
| 25 | 6 | 0 | -5.026347 | -2.899400 | 0.006101  |
| 26 | 6 | 0 | -3.825529 | -2.175737 | 0.005040  |
| 27 | 6 | 0 | -0.674804 | -0.955898 | -0.017783 |
| 28 | 6 | 0 | 0.674797  | -0.955899 | -0.017784 |
| 29 | 1 | 0 | -0.946059 | 3.700404  | 0.005230  |
| 30 | 1 | 0 | -3.363010 | 3.709784  | 0.005748  |
| 31 | 1 | 0 | 3.363006  | 3.709782  | 0.005737  |
| 32 | 1 | 0 | 0.946055  | 3.700402  | 0.005203  |
| 33 | 1 | 0 | 5.683938  | 2.052465  | 0.001467  |
| 34 | 1 | 0 | -5.683944 | 2.052462  | 0.001438  |
| 35 | 1 | 0 | 2.897004  | -2.731453 | 0.009885  |
| 36 | 1 | 0 | 4.990318  | -3.983867 | 0.009357  |
| 37 | 1 | 0 | 7.175419  | -2.826345 | 0.004379  |
| 38 | 1 | 0 | 7.271157  | -0.340387 | 0.000635  |
| 39 | 1 | 0 | -7.271157 | -0.340402 | 0.000583  |
| 40 | 1 | 0 | -7.175407 | -2.826358 | 0.004371  |
| 41 | 1 | 0 | -4.990301 | -3.983871 | 0.009408  |
| 42 | 1 | 0 | -2.896988 | -2.731442 | 0.009951  |
| 43 | 1 | 0 | -1.196392 | -1.900855 | -0.030848 |
| 44 | 1 | 0 | 1.196381  | -1.900857 | -0.030850 |

-----  
No imaginary frequency.

Total energy = -1076.81399616 hartree.

**Table S19.** Cartesian Coordinates of **3'** (Open-Shell Triplet) at the UB3LYP/6-311G(d) level

| Center Number | Atomic Number | Atomic Type | Coordinates (Angstroms) |           |          |
|---------------|---------------|-------------|-------------------------|-----------|----------|
|               |               |             | X                       | Y         | Z        |
| 1             | 6             | 0           | -0.729082               | 1.521499  | 0.000518 |
| 2             | 6             | 0           | -1.442047               | 0.274274  | 0.000329 |
| 3             | 6             | 0           | 1.442048                | 0.274276  | 0.000329 |
| 4             | 6             | 0           | 0.729082                | 1.521500  | 0.000518 |
| 5             | 6             | 0           | -1.469825               | 2.731162  | 0.000713 |
| 6             | 6             | 0           | -2.846258               | 2.746067  | 0.000727 |
| 7             | 6             | 0           | -3.550806               | 1.531033  | 0.000523 |
| 8             | 6             | 0           | -2.856254               | 0.291554  | 0.000307 |
| 9             | 6             | 0           | 2.856255                | 0.291558  | 0.000308 |
| 10            | 6             | 0           | 3.550805                | 1.531037  | 0.000522 |
| 11            | 6             | 0           | 2.846255                | 2.746070  | 0.000725 |
| 12            | 6             | 0           | 1.469822                | 2.731164  | 0.000712 |
| 13            | 6             | 0           | 3.883827                | -0.770303 | 0.000117 |
| 14            | 6             | 0           | 5.165243                | -0.117671 | 0.000216 |
| 15            | 6             | 0           | 4.957299                | 1.289085  | 0.000482 |

|    |   |   |           |           |           |
|----|---|---|-----------|-----------|-----------|
| 16 | 6 | 0 | -4.957300 | 1.289079  | 0.000484  |
| 17 | 6 | 0 | -5.165242 | -0.117677 | 0.000217  |
| 18 | 6 | 0 | -3.883825 | -0.770308 | 0.000115  |
| 19 | 6 | 0 | 3.848160  | -2.160020 | -0.000177 |
| 20 | 6 | 0 | 5.046132  | -2.888919 | -0.000340 |
| 21 | 6 | 0 | 6.287497  | -2.248176 | -0.000220 |
| 22 | 6 | 0 | 6.353723  | -0.858483 | 0.000054  |
| 23 | 6 | 0 | -6.353722 | -0.858491 | 0.000055  |
| 24 | 6 | 0 | -6.287493 | -2.248184 | -0.000222 |
| 25 | 6 | 0 | -5.046128 | -2.888925 | -0.000346 |
| 26 | 6 | 0 | -3.848157 | -2.160025 | -0.000182 |
| 27 | 6 | 0 | -0.678428 | -0.936861 | 0.000213  |
| 28 | 6 | 0 | 0.678430  | -0.936861 | 0.000213  |
| 29 | 1 | 0 | -0.953268 | 3.681194  | 0.000863  |
| 30 | 1 | 0 | -3.381762 | 3.690572  | 0.000888  |
| 31 | 1 | 0 | 3.381758  | 3.690577  | 0.000884  |
| 32 | 1 | 0 | 0.953264  | 3.681195  | 0.000861  |
| 33 | 1 | 0 | 5.730246  | 2.047511  | 0.000614  |
| 34 | 1 | 0 | -5.730247 | 2.047504  | 0.000616  |
| 35 | 1 | 0 | 2.916497  | -2.710354 | -0.000318 |
| 36 | 1 | 0 | 5.002763  | -3.973323 | -0.000572 |
| 37 | 1 | 0 | 7.199094  | -2.836557 | -0.000347 |
| 38 | 1 | 0 | 7.313971  | -0.351395 | 0.000144  |
| 39 | 1 | 0 | -7.313969 | -0.351404 | 0.000147  |
| 40 | 1 | 0 | -7.199090 | -2.836565 | -0.000349 |
| 41 | 1 | 0 | -5.002758 | -3.973329 | -0.000580 |
| 42 | 1 | 0 | -2.916494 | -2.710357 | -0.000326 |
| 43 | 1 | 0 | -1.194872 | -1.885420 | 0.000154  |
| 44 | 1 | 0 | 1.194875  | -1.885418 | 0.000154  |

No imaginary frequency.

Total energy = -1076.81285948 hartree.

**Table S20.** Cartesian Coordinates of **3'** (Open-Shell Singlet) at the UB3LYP/6-311G(d) level

| Center<br>Number | Atomic<br>Number | Atomic<br>Type | Coordinates (Angstroms) |           |           |
|------------------|------------------|----------------|-------------------------|-----------|-----------|
|                  |                  |                | X                       | Y         | Z         |
| 1                | 6                | 0              | -0.718672               | 1.525912  | 0.000528  |
| 2                | 6                | 0              | -1.439701               | 0.272820  | 0.000339  |
| 3                | 6                | 0              | 1.439701                | 0.272822  | 0.000339  |
| 4                | 6                | 0              | 0.718670                | 1.525913  | 0.000527  |
| 5                | 6                | 0              | -1.468629               | 2.742659  | 0.000714  |
| 6                | 6                | 0              | -2.836451               | 2.756806  | 0.000721  |
| 7                | 6                | 0              | -3.549205               | 1.535887  | 0.000518  |
| 8                | 6                | 0              | -2.843339               | 0.287865  | 0.000307  |
| 9                | 6                | 0              | 2.843339                | 0.287868  | 0.000307  |
| 10               | 6                | 0              | 3.549203                | 1.535892  | 0.000517  |
| 11               | 6                | 0              | 2.836448                | 2.756810  | 0.000719  |
| 12               | 6                | 0              | 1.468626                | 2.742661  | 0.000713  |
| 13               | 6                | 0              | 3.870936                | -0.777748 | 0.000101  |
| 14               | 6                | 0              | 5.146515                | -0.124209 | 0.000224  |
| 15               | 6                | 0              | 4.932423                | 1.293968  | 0.000481  |
| 16               | 6                | 0              | -4.932424               | 1.293962  | 0.000482  |
| 17               | 6                | 0              | -5.146514               | -0.124215 | 0.000224  |
| 18               | 6                | 0              | -3.870935               | -0.777752 | 0.000100  |
| 19               | 6                | 0              | 3.835650                | -2.167178 | -0.000202 |
| 20               | 6                | 0              | 5.034607                | -2.895614 | -0.000351 |
| 21               | 6                | 0              | 6.270660                | -2.251408 | -0.000208 |
| 22               | 6                | 0              | 6.333305                | -0.857961 | 0.000076  |
| 23               | 6                | 0              | -6.333303               | -0.857969 | 0.000076  |
| 24               | 6                | 0              | -6.270656               | -2.251415 | -0.000211 |
| 25               | 6                | 0              | -5.034602               | -2.895619 | -0.000354 |
| 26               | 6                | 0              | -3.835646               | -2.167182 | -0.000205 |
| 27               | 6                | 0              | -0.677070               | -0.942472 | 0.000218  |
| 28               | 6                | 0              | 0.677072                | -0.942471 | 0.000218  |
| 29               | 1                | 0              | -0.950404               | 3.691489  | 0.000862  |

|    |   |   |           |           |           |
|----|---|---|-----------|-----------|-----------|
| 30 | 1 | 0 | -3.374108 | 3.700103  | 0.000876  |
| 31 | 1 | 0 | 3.374104  | 3.700107  | 0.000874  |
| 32 | 1 | 0 | 0.950400  | 3.691490  | 0.000860  |
| 33 | 1 | 0 | 5.708930  | 2.049039  | 0.000614  |
| 34 | 1 | 0 | -5.708932 | 2.049031  | 0.000616  |
| 35 | 1 | 0 | 2.904864  | -2.719007 | -0.000350 |
| 36 | 1 | 0 | 4.993122  | -3.979994 | -0.000585 |
| 37 | 1 | 0 | 7.185000  | -2.835708 | -0.000327 |
| 38 | 1 | 0 | 7.292854  | -0.349605 | 0.000176  |
| 39 | 1 | 0 | -7.292853 | -0.349613 | 0.000176  |
| 40 | 1 | 0 | -7.184996 | -2.835716 | -0.000330 |
| 41 | 1 | 0 | -4.993116 | -3.980000 | -0.000590 |
| 42 | 1 | 0 | -2.904860 | -2.719010 | -0.000354 |
| 43 | 1 | 0 | -1.196178 | -1.889177 | 0.000154  |
| 44 | 1 | 0 | 1.196181  | -1.889176 | 0.000154  |

-----  
No imaginary frequency.

Total energy = -1076.81837063 hartree.



## 7. $^1\text{H}$ and $^{13}\text{C}$ NMR spectral data

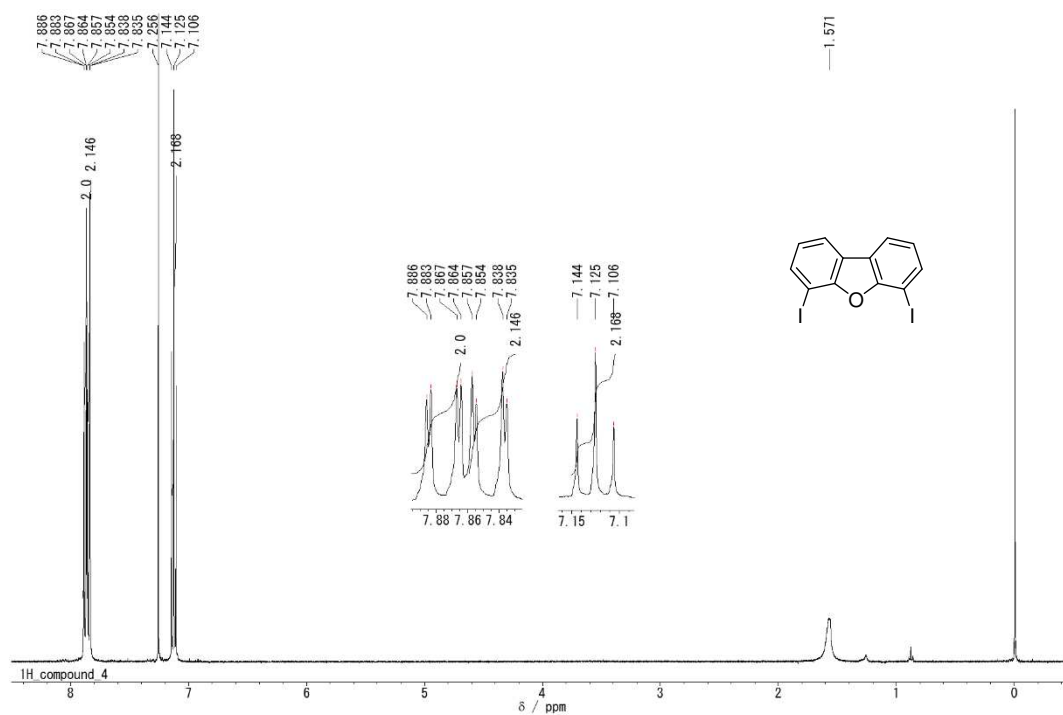

$^1\text{H}$  NMR spectrum of **5** in  $\text{CDCl}_3$  solution (400 MHz).

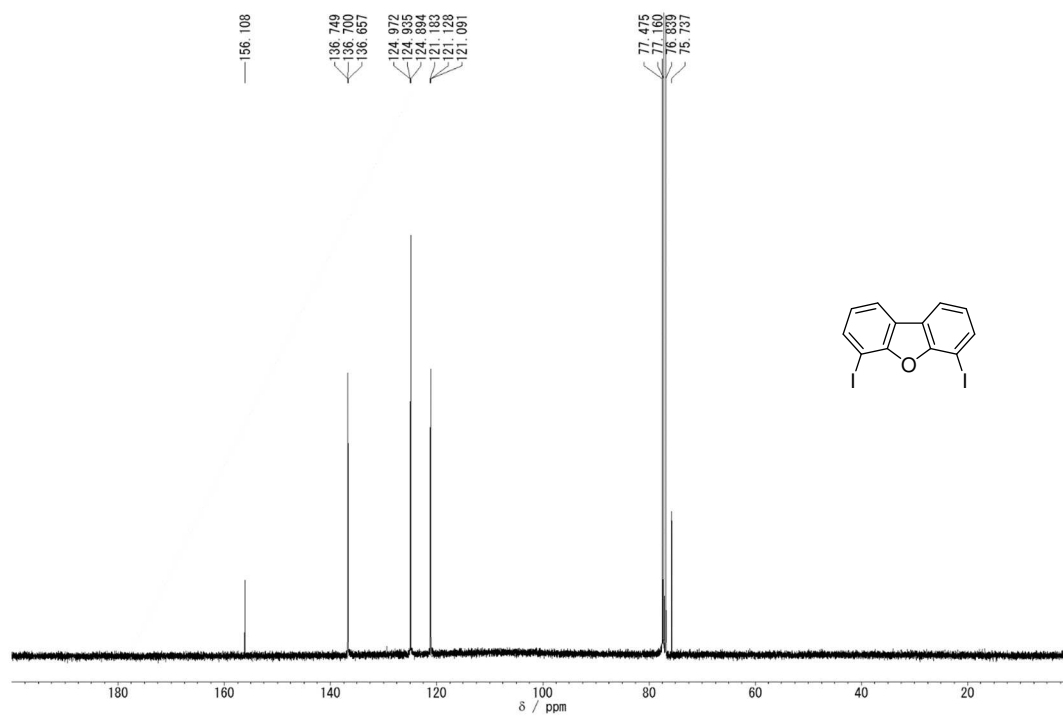

$^{13}\text{C}$  NMR spectrum of **5** in  $\text{CDCl}_3$  solution (100 MHz).

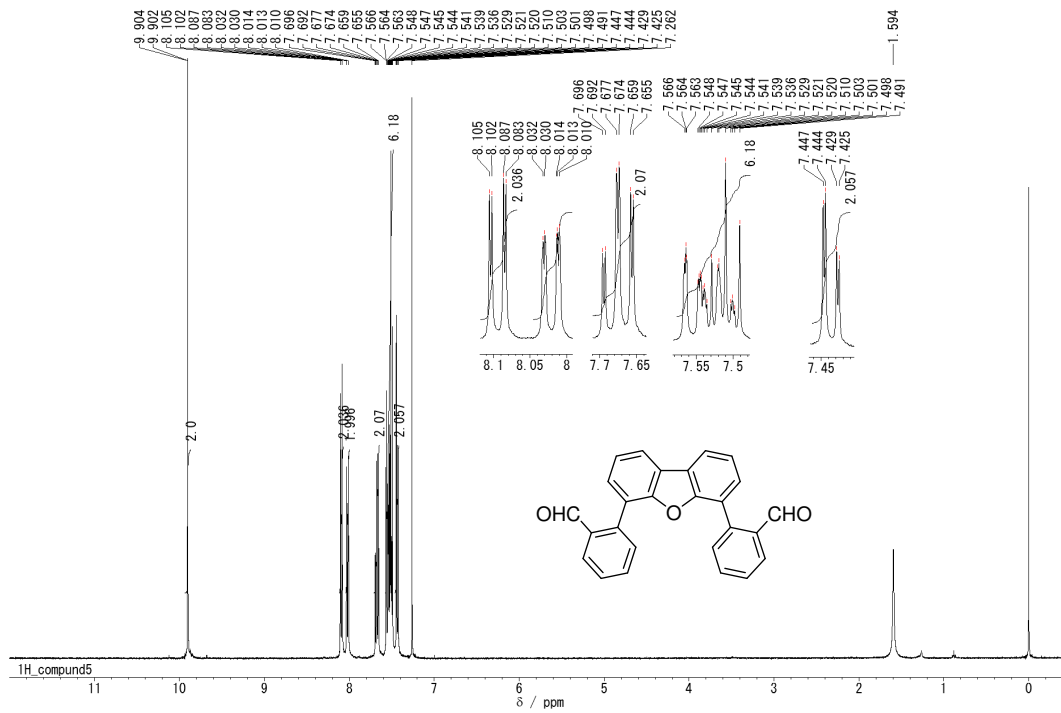

<sup>1</sup>H NMR spectrum of 6 in CDCl<sub>3</sub> solution (400 MHz).

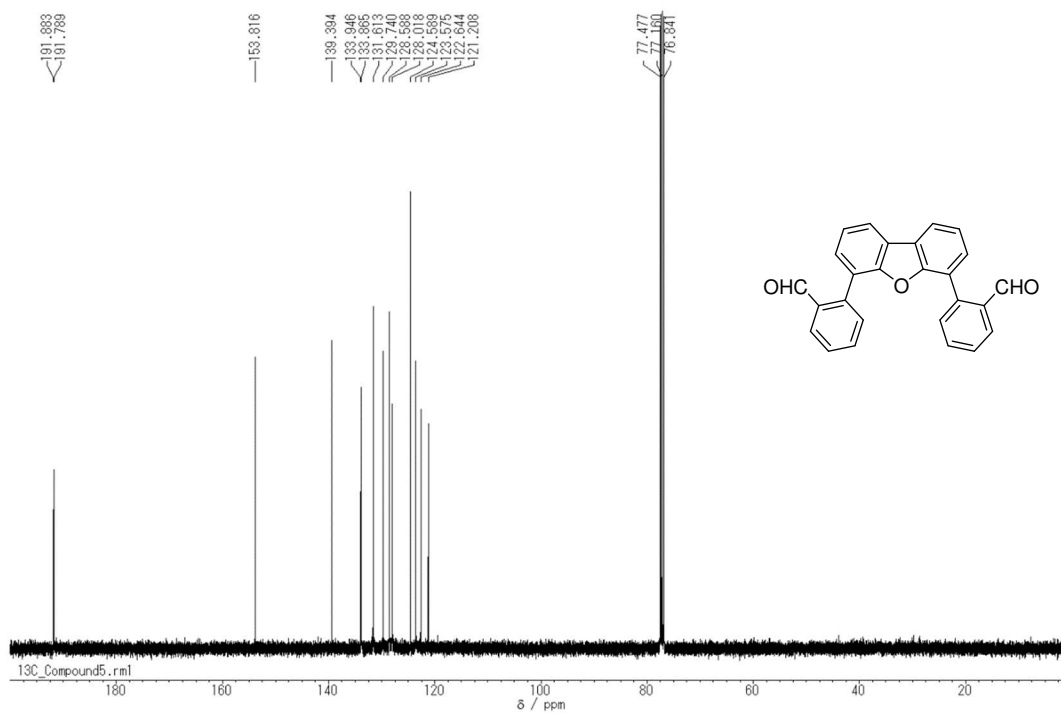

<sup>13</sup>C NMR spectrum of 6 in CDCl<sub>3</sub> solution (100 MHz).

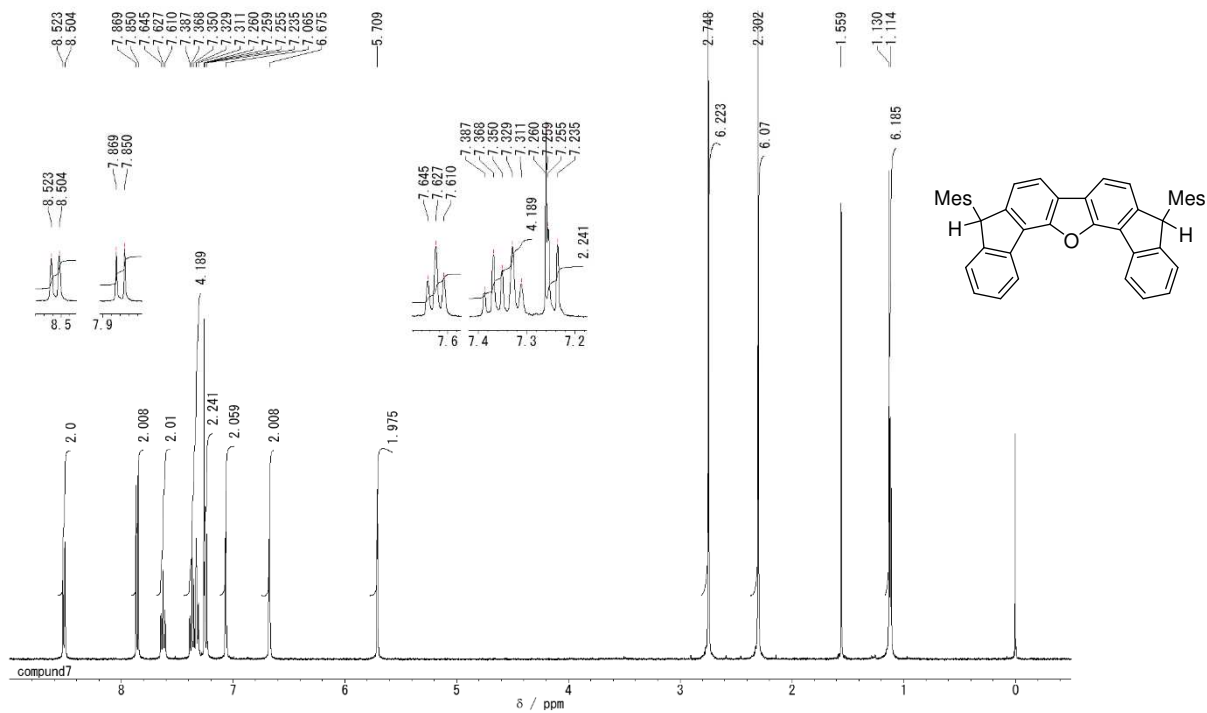

**<sup>1</sup>H NMR spectrum of 7 in CDCl<sub>3</sub> solution (400 MHz).**

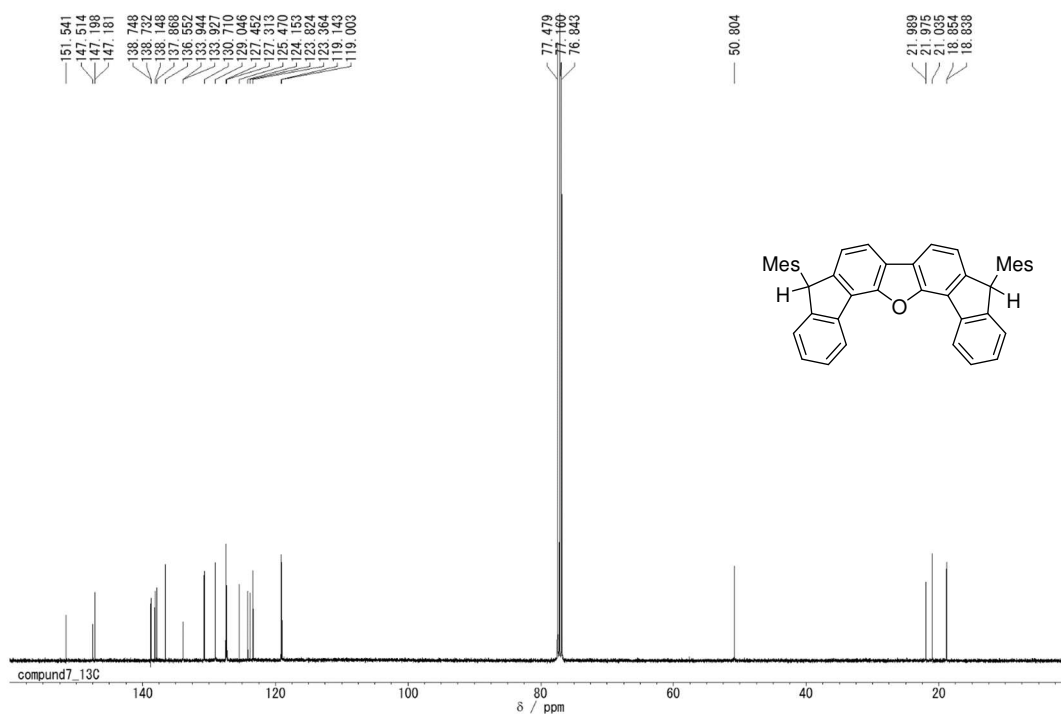

**<sup>13</sup>C NMR spectrum of 7 in CDCl<sub>3</sub> solution (100 MHz).**

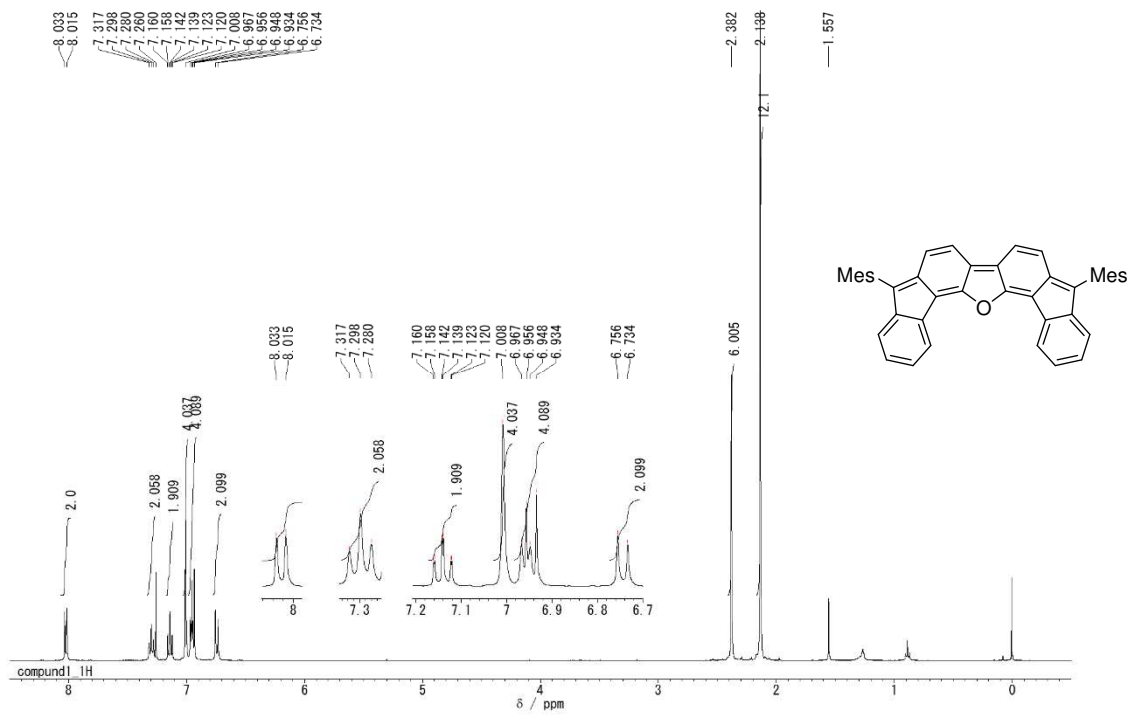

<sup>1</sup>H NMR spectrum of **DFFu** in CDCl<sub>3</sub> solution (400 MHz).

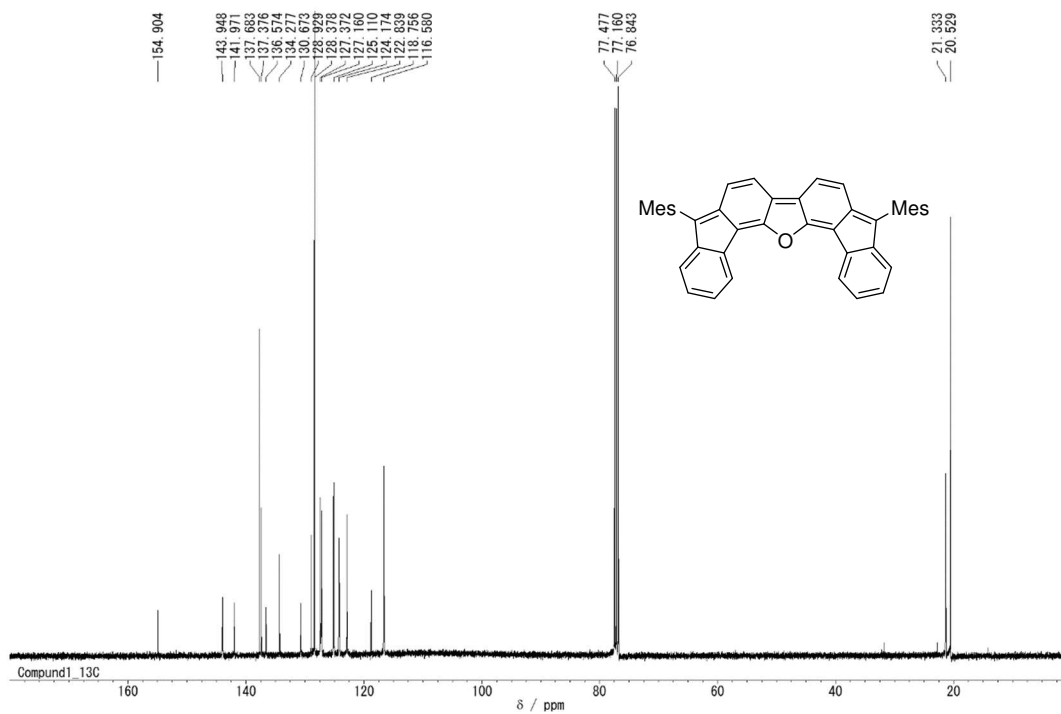

<sup>13</sup>C NMR spectrum of **DFFu** in CDCl<sub>3</sub> solution (100 MHz).

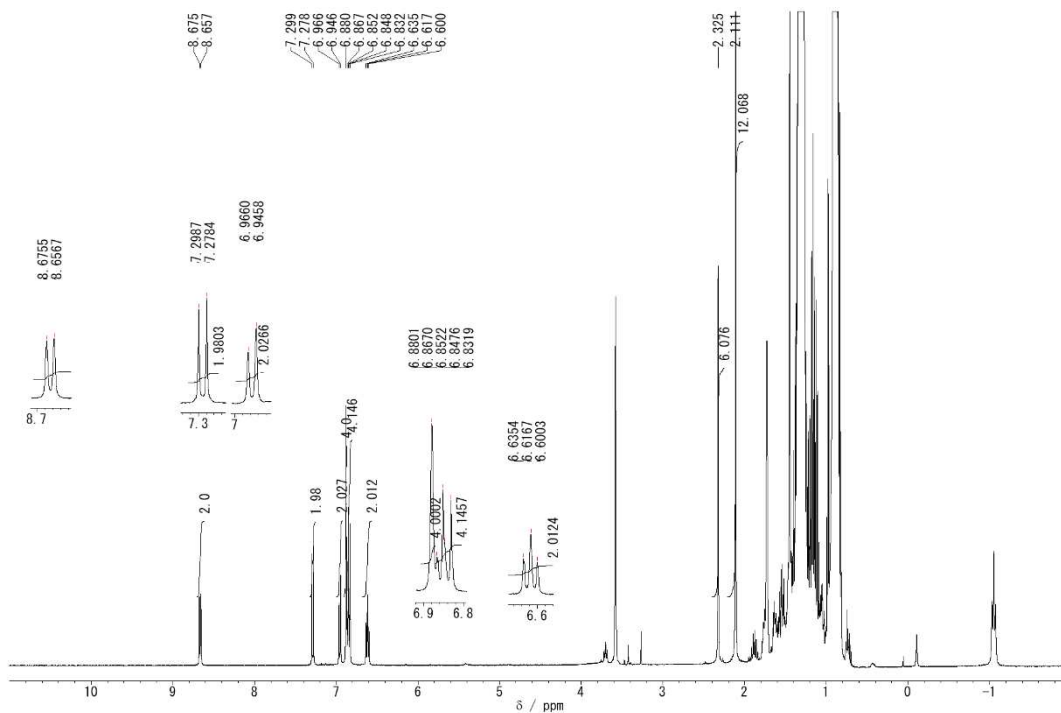

$^1\text{H}$  NMR spectrum of **DFFu** $^{2-}$  in  $\text{THF-}d_8$  solution (400 MHz). Most aliphatic signals are due to an excess amount of *n*-BuLi in hexane.

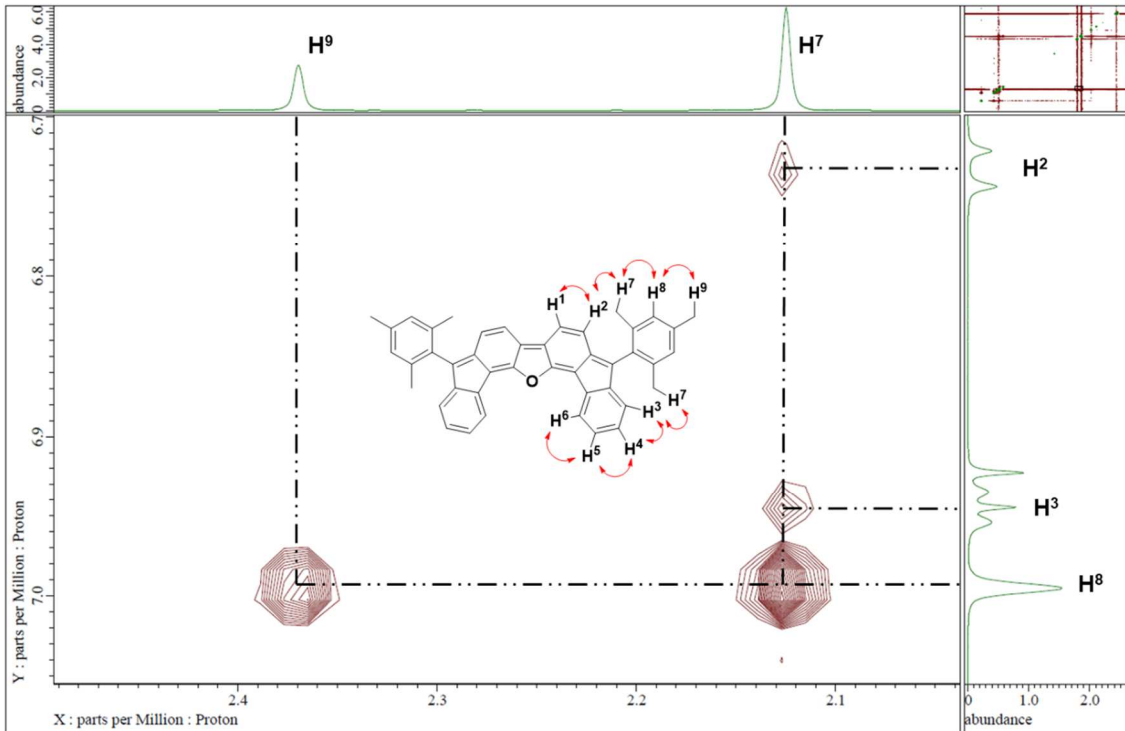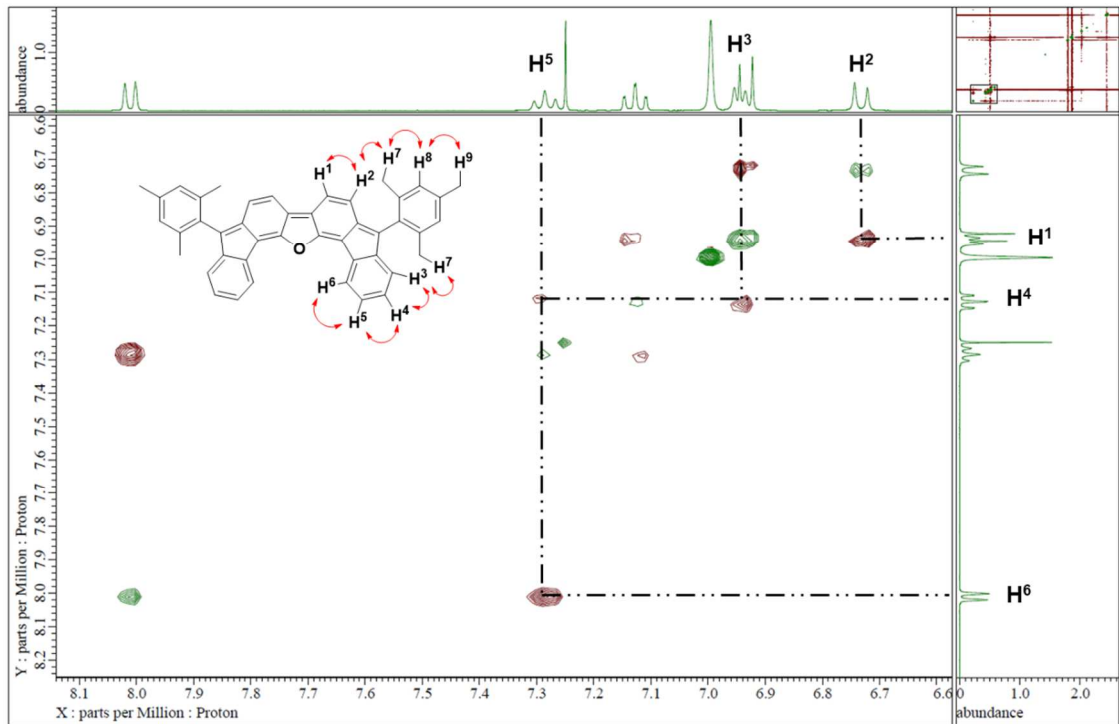

NOESY spectrum of **DFFu** in CDCl<sub>3</sub> solution.

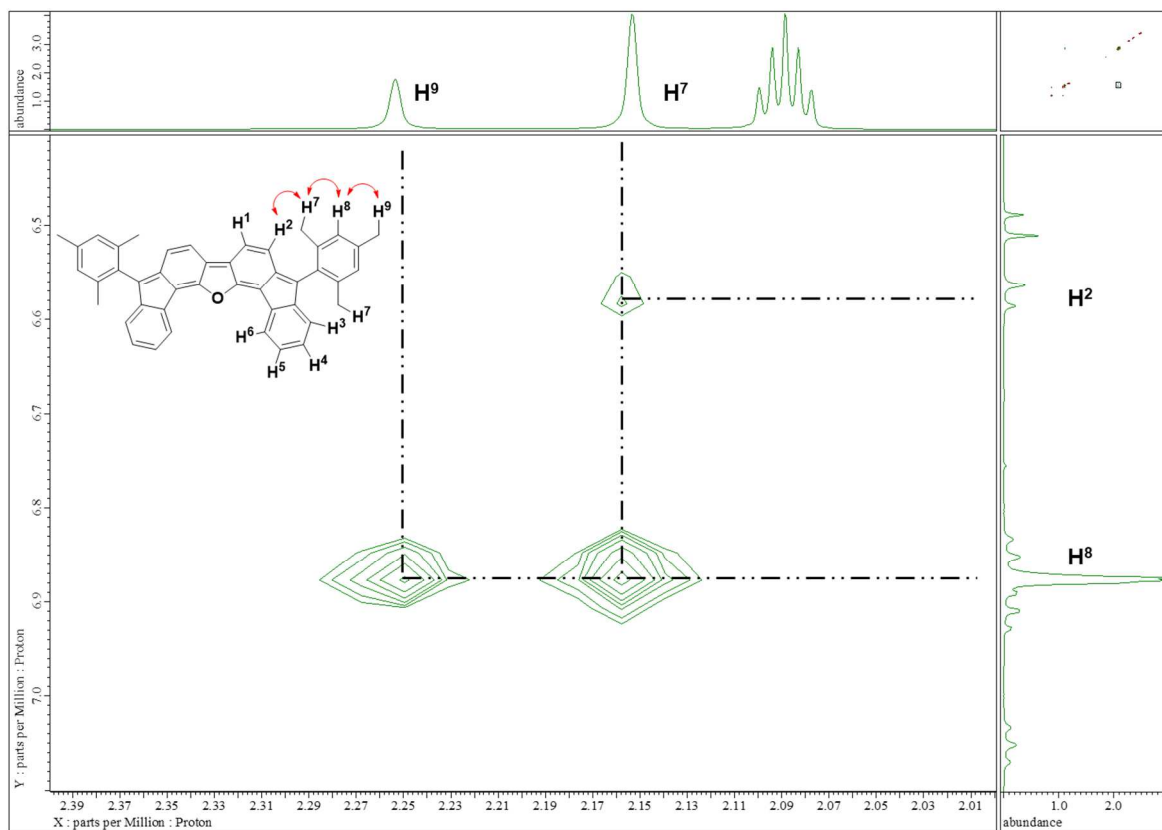

NOESY spectrum of **DFFu** in *p*-xylene-*d*<sub>10</sub> solution.

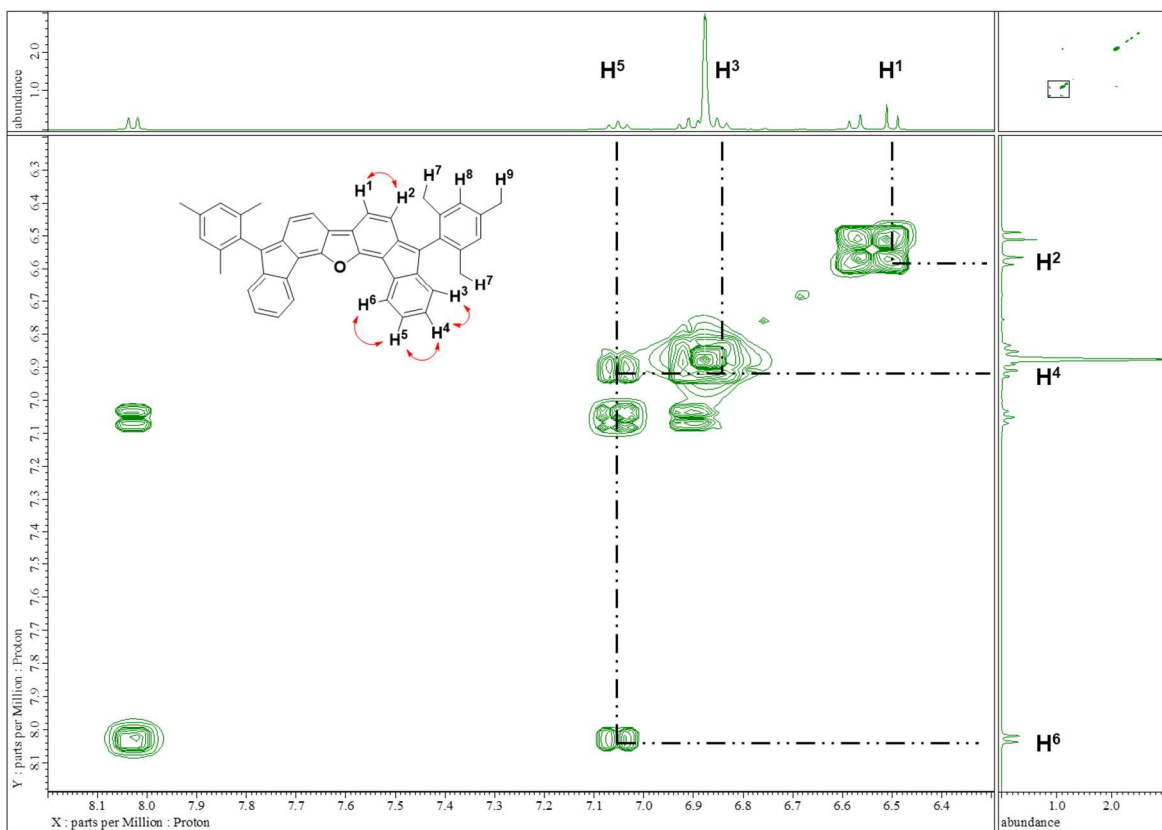

COSY spectrum of **DFFu** in *p*-xylene-*d*<sub>10</sub> solution.

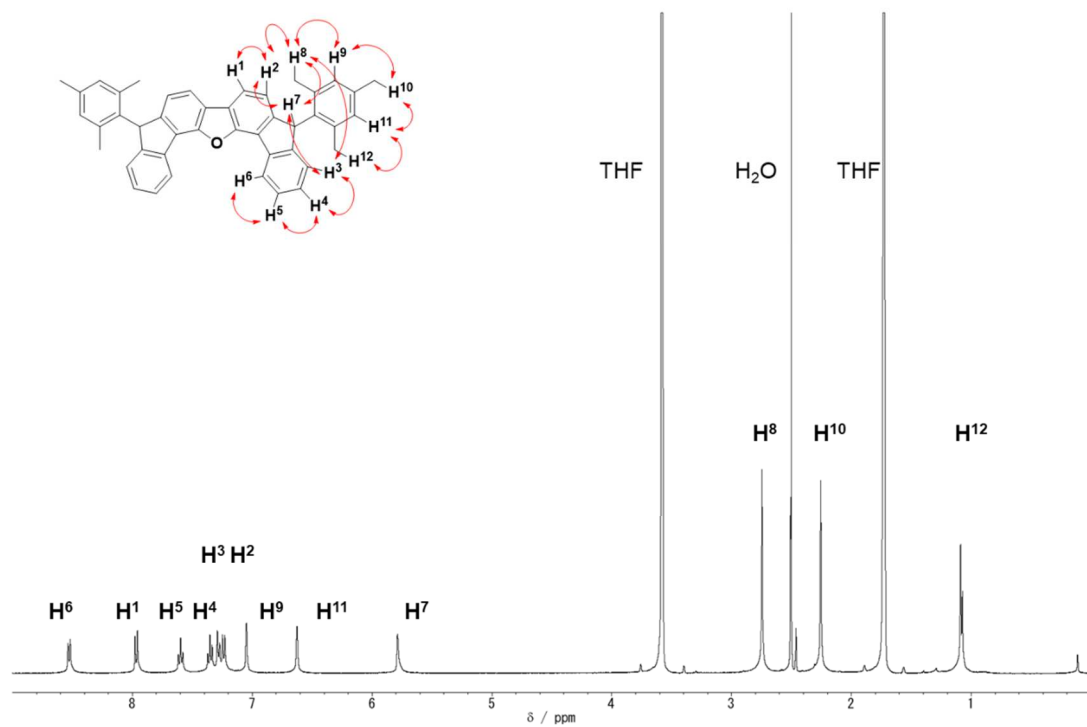

$^1\text{H}$  NMR spectrum of **7** in  $\text{THF-}d_8$  solution.  
All the signals were fully assigned by 1D NOE and  $^1\text{H-}^1\text{H}$  COSY experiments.

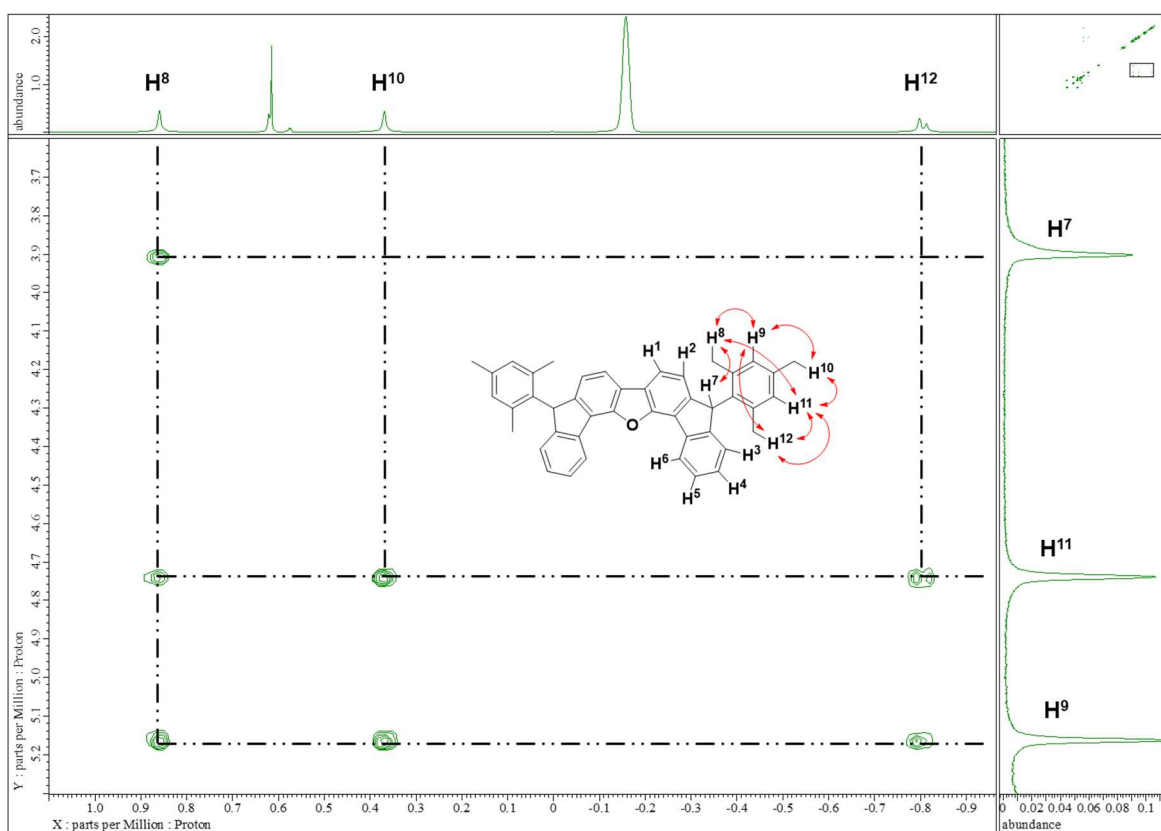

$^1\text{H-}^1\text{H}$  COSY spectrum of **7** in  $\text{THF-}d_8$  solution.



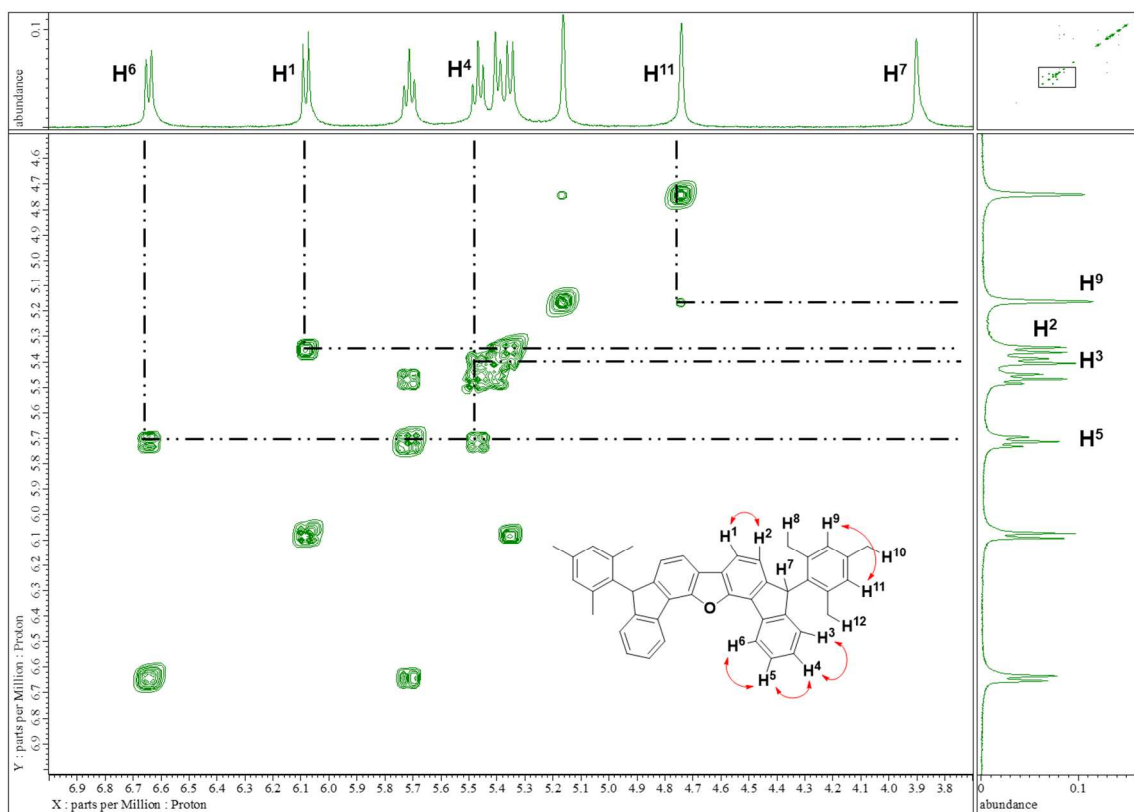

$^1\text{H}$ - $^1\text{H}$  COSY spectrum of **7** in  $\text{THF-}d_8$  solution.

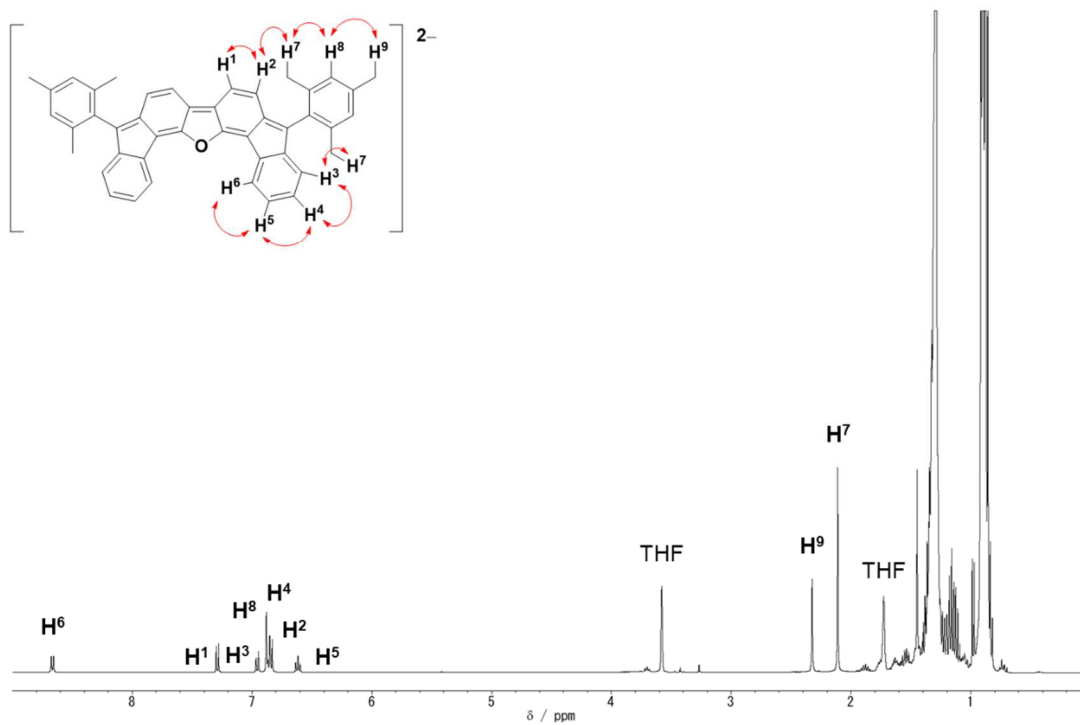

Fully assigned  $^1\text{H}$  NMR spectrum of **DFFu** $^{2-}$  in  $\text{CDCl}_3$  solution.  
All the signals were fully assigned by 1D NOE and  $^1\text{H}$ - $^1\text{H}$  COSY experiments.

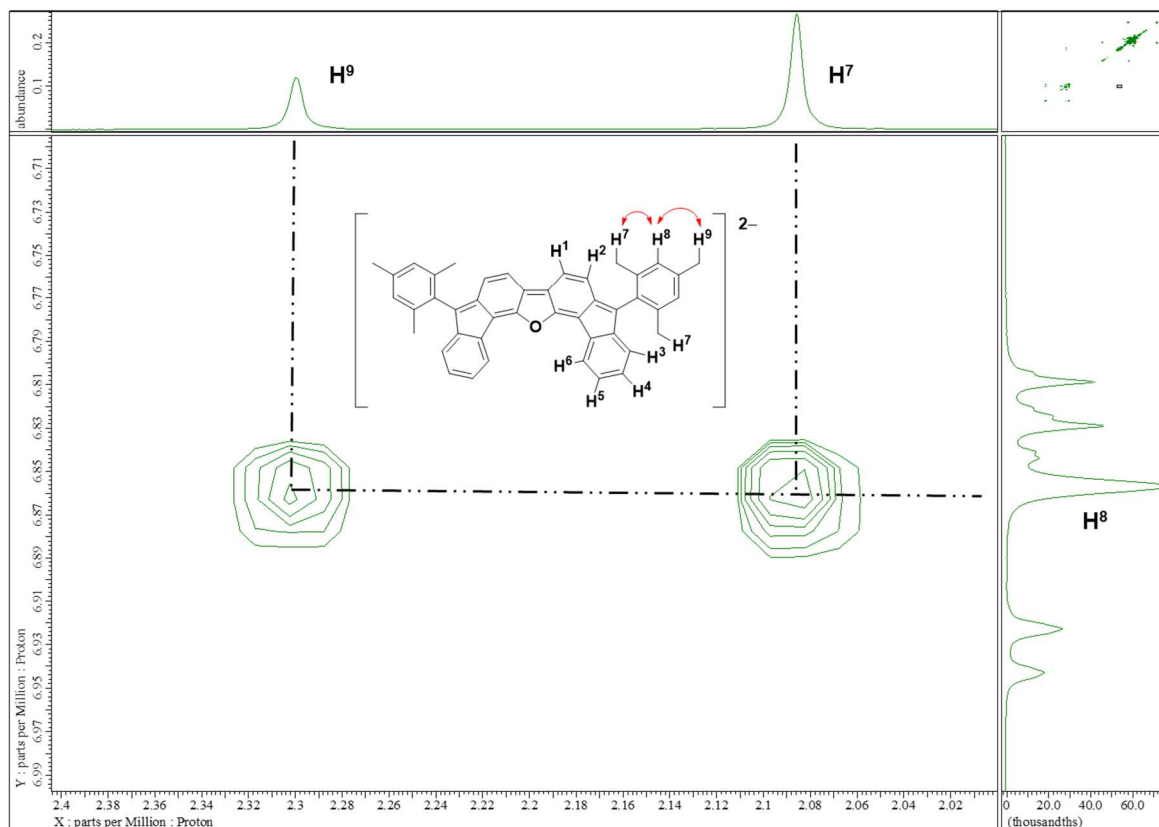

$^1\text{H}$ - $^1\text{H}$  COSY spectrum of **DFFu** $^{2-}$  in  $\text{THF-}d_8$  solution.

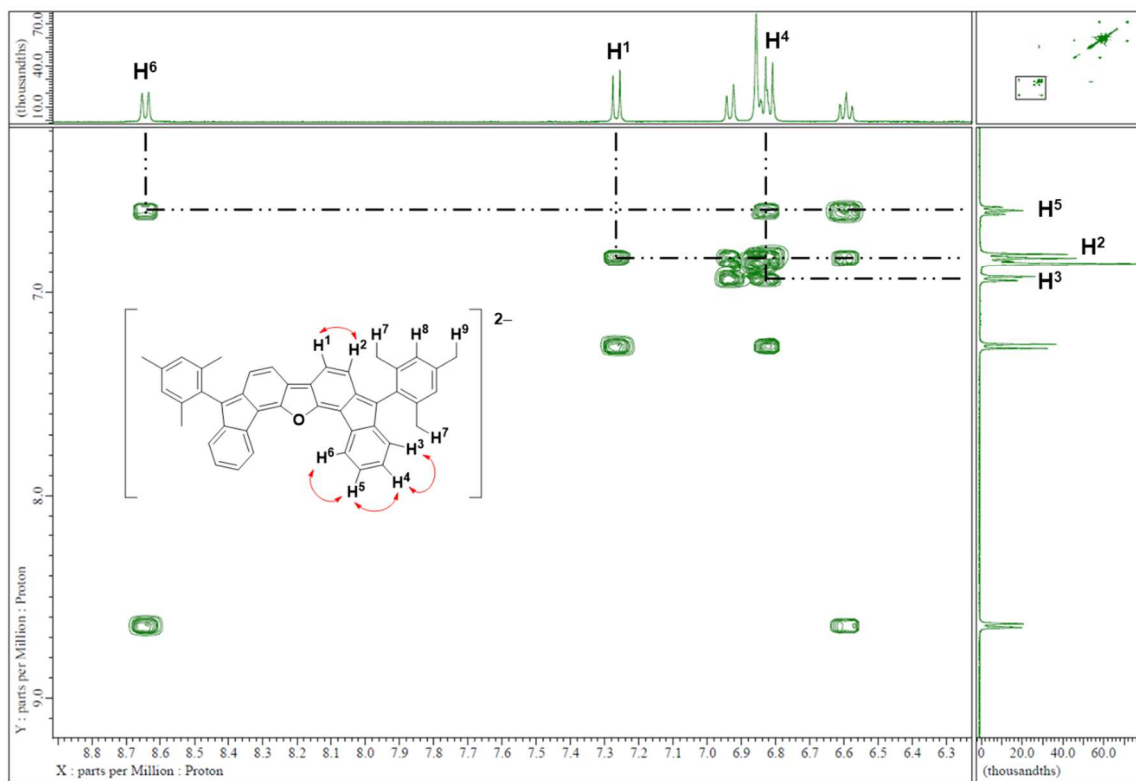

$^1\text{H}$ - $^1\text{H}$  COSY spectrum of  $\text{DFFu}^{2-}$  in  $\text{THF-}d_8$  solution.

## 8. References

1. Frisch, M. J.; Trucks, G. W.; Schlegel, H. B.; Scuseria, G. E.; Robb, M. A.; Cheeseman, J. R.; Scalmani, G.; Barone, V.; Mennucci, B.; Petersson, G. A.; Nakatsuji, H.; Caricato, M.; Li, X.; Hratchian, H. P.; Izmaylov, A. F.; Bloino, J.; Zheng, G.; Sonnenberg, J. L.; Hada, M.; Ehara, M.; Toyota, K.; Fukuda, R.; Hasegawa, J.; Ishida, M.; Nakajima, T.; Honda, Y.; Kitao, O.; Nakai, H.; Vreven, T.; Montgomery, J. A., Jr.; Peralta, J. E.; Ogliaro, F.; Bearpark, M.; Heyd, J. J.; Brothers, E.; Kudin, K. N.; Staroverov, V. N.; Kobayashi, R.; Normand, J.; Raghavachari, K.; Rendell, A.; Burant, J. C.; Iyengar, S. S.; Tomasi, J.; Cossi, M.; Rega, N.; Millam, J. M.; Klene, M.; Knox, J. E.; Cross, J. B.; Bakken, V.; Adamo, C.; Jaramillo, J.; Gomperts, R.; Stratmann, R. E.; Yazyev, O.; Austin, A. J.; Cammi, R.; Pomelli, C.; Ochterski, J. W.; Martin, R. L.; Morokuma, K.; Zakrzewski, V. G.; Voth, G. A.; Salvador, P.; Dannenberg, J. J.; Dapprich, S.; Daniels, A. D.; Farkas, Ö.; Foresman, J. B.; Ortiz, J. V.; Cioslowski, J.; Fox, D. J. *Gaussian 09*; Revision D.01; Gaussian Inc.: Wallingford CT, 2009.
2. Herges, R.; Geuenich, D. *J. Phys. Chem. A* **2001**, *105*, 3214.
3. Geuenich, D.; Hess, K.; Köhler, F.; Herges, R. *Chem. Rev.* **2005**, *105*, 3758.
4. K. Sbagoud, M. Mamada, J. Marrot, S. Tokito, A. Yassar, M. Frigoli, *Chem. Sci.* **2015**, *6*, 3402.
5. M. A. Majewski, P. J. Chmielewski, A. Chien, Y. Hong, T. Lis, M. Witwicki, D. Kim, P. M. Zimmerman, M. Stępień, *Chem. Sci.* **2019**, *10*, 3413.
6. Dolomanov, O. V.; Bourhis, L. J.; Gildea, R. J.; Howard, J. A. K.; Puschmann, H. *J. Appl. Cryst.* **2009**, *42*, 339.
7. Sheldrick, G. *Acta Crystallogr., Sect. A* **2015**, *71*, 3.
8. Sheldrick, G. M. *Acta Crystallogr., Sect. C* **2015**, *71*, 3.
9. Rudebusch, G. E.; Zafra, J. L.; Jorner, K.; Fukuda, K.; Marshall, J. L.; Arrechea-Marcos, I.; Espejo, G. L.; Ortiz, R. P.; Gómez-García, C. J.; Zakharov, L. N.; Nakano, M.; Ottosson, H.; Casado, J.; Haley, M. M. *Nat. Chem.* **2016**, *8*, 753.
10. Yamaguchi, K. *Chem. Phys. Lett.* **1975**, *33*, 330.
